# Supplementary material for: Palladium(ii)-1-phenylthio-2-arylchalcogenoethane complexes: palladium phosphide nano-peanut and ribbon formation controlled by chalcogen and Suzuki coupling activation
Source: Royal Society of Chemistry journal article supplement (doi:10.1039/c4dt03471f), 2015-01-01
Supplement: c4dt03471f1.pdf [file c4dt03471f1.pdf]

## ESI for

### **Palladium(II) -1-phenylthio-2-arylchalcogenoethane complexes: palladium phosphide nano-peanut and ribbon formation controlled by chalcogen and Suzuki coupling activation**

Gyandshwar Kumar Rao, Arun Kumar, Fariha Saleem, Mahabir P. Singh, Satyendra Kumar, Bharat Kumar, Goutam Mukherjee and Ajai K. Singh\*

Department of Chemistry, Indian Institute of Technology Delhi, New Delhi-110016, India.

**Table S1. Crystal Data and Structure Refinement Parameters for 1 and 3**

| Compound                                           | <b>1</b>                                                                                                                                      | <b>3</b>                                                                                                               |
|----------------------------------------------------|-----------------------------------------------------------------------------------------------------------------------------------------------|------------------------------------------------------------------------------------------------------------------------|
| Empirical formula                                  | C <sub>14</sub> H <sub>14</sub> Cl <sub>2</sub> PdS <sub>2</sub>                                                                              | C <sub>15</sub> H <sub>16</sub> Cl <sub>2</sub> OPdSTe                                                                 |
| Formula wt.                                        | 423.69                                                                                                                                        | 549.25                                                                                                                 |
| Colour                                             | Red                                                                                                                                           | Orange                                                                                                                 |
| Crystal size, mm <sup>3</sup>                      | 0.553 × 0.295 × 0.207                                                                                                                         | 0.517 × 0.301 × 0.225                                                                                                  |
| Crystal system                                     | Monoclinic                                                                                                                                    | Orthorhombic                                                                                                           |
| Space group                                        | <i>C2/c</i>                                                                                                                                   | <i>P2<sub>1</sub>2<sub>1</sub>2<sub>1</sub></i>                                                                        |
| Unit Cell dimension                                | <i>a</i> = 22.333(3) Å<br><i>b</i> = 10.6408(15) Å<br><i>c</i> = 25.506(4) Å<br>$\alpha = \gamma = 90.00^\circ$<br>$\beta = 111.481(2)^\circ$ | <i>a</i> = 8.3567(16) Å<br><i>b</i> = 14.188(3) Å<br><i>c</i> = 14.676(3) Å<br>$\alpha = \beta = \gamma = 90.00^\circ$ |
| Volume [Å <sup>3</sup> ]                           | 1621.9(15)                                                                                                                                    | 1740.0(6)                                                                                                              |
| <i>Z</i>                                           | 4                                                                                                                                             | 4                                                                                                                      |
| $\rho$ , (calc.) Mg/m <sup>3</sup>                 | 1.721                                                                                                                                         | 2.097                                                                                                                  |
| $\mu$ , mm <sup>-1</sup>                           | 1.714                                                                                                                                         | 3.122                                                                                                                  |
| <i>F</i> (000)                                     | 840                                                                                                                                           | 1048                                                                                                                   |
| $\theta$ , range (°)                               | 2.80 to 24.99                                                                                                                                 | 2.00 to 25.00                                                                                                          |
| Index ranges                                       | -22 ≤ <i>h</i> ≤ 22<br>-9 ≤ <i>k</i> ≤ 9<br>-14 ≤ <i>l</i> ≤ 14                                                                               | -9 ≤ <i>h</i> ≤ 9<br>-16 ≤ <i>k</i> ≤ 16<br>-17 ≤ <i>l</i> ≤ 17                                                        |
| Reflections collected                              | 1400                                                                                                                                          | 3057                                                                                                                   |
| Independent reflections( <i>R</i> <sub>int</sub> ) | 1307 [ <i>R</i> (int) = 0.0309]                                                                                                               | 2944 [ <i>R</i> <sub>int</sub> = 0.0420]                                                                               |
| Completeness to max. $\theta$ , %                  | 99.7                                                                                                                                          | 99.9                                                                                                                   |
| Max. / min. Transmission                           | 0.558 / 0.711                                                                                                                                 | 0.215 / 0.081                                                                                                          |
| Data / restraints / parameters                     | 1400 / 0 / 87                                                                                                                                 | 3057 / 0 / 192                                                                                                         |

|                                                  |                                   |                                     |
|--------------------------------------------------|-----------------------------------|-------------------------------------|
| Goodness-of-fit on $F^2$                         | 1.264                             | 1.164                               |
| Final R indices<br>[ $I > 2\sigma(I)$ ]          | $R_I = 0.0354$<br>$wR_2 = 0.0817$ | $R_I = 0.0398$ ,<br>$wR_2 = 0.0745$ |
| R indices<br>(all data)                          | $R_I = 0.0386$<br>$wR_2 = 0.0831$ | $R_I = 0.0419$ ,<br>$wR_2 = 0.0754$ |
| Largest diff. peak /hole<br>[e.Å <sup>-3</sup> ] | 0.146 / -1.334                    | 0.103 / -0.819                      |
| CCDC                                             | 1014070                           | 1014071                             |

**Table S2. Selected Bond Lengths (Å) and Bond Angles (°) of 1**

| Bond Length (Å)  |            |                   |            |
|------------------|------------|-------------------|------------|
| Pd(1)—Cl(1)      | 2.330(13)  | Pd(1)—S(1)        | 2.285(14)  |
| S(1)—C(7)        | 1.833(5)   | C(2)—C(1)         | 1.400(6)   |
| C(3)—C(2)        | 1.381(6)   | C(4)—C(5)         | 1.390(7)   |
| C(6)—C(1)        | 1.389(6)   | C(5)—C(6)         | 1.383(6)   |
| C(6)—S(1)        | 1.793(4)   | C(7)—C(7)         | 1.521(9)   |
| Bond Angle (°)   |            |                   |            |
| S(1)—Pd(1)—S(1)  | 89.11(8)   | S(1)—Pd(1)—Cl(1)  | 177.22(4)  |
| S(1)—Pd(1)—Cl(1) | 88.52(6)   | Cl(1)—Pd(1)—Cl(1) | 93.89(7)   |
| C(6)—S(1)—C(7)   | 99.4(2)    | C(7)—S(1)—Pd(1)   | 101.99(19) |
| C(6)—S(1)—Pd(1)  | 109.28(13) | C(7)—C(7)—S(1)    | 108.0(4)   |
| C(3)—C(4)—C(5)   | 120.7(4)   | C(2)—C(3)—C(4)    | 119.6(4)   |
| C(6)—C(5)—C(4)   | 119.3(4)   | C(3)—C(2)—C(1)    | 120.7(4)   |
| C(5)—C(6)—C(1)   | 121.0(4)   | C(5)—C(6)—S(1)    | 117.8(3)   |
| C(1)—C(6)—S(1)   | 121.1(3)   | C(6)—C(1)—C(2)    | 118.7(4)   |

**Table S3. Selected Bond Lengths (Å) and Bond Angles (°) of 3**

| Bond Length (Å)   |           |                   |           |
|-------------------|-----------|-------------------|-----------|
| Pd(1)—S(1)        | 2.260(19) | Pd(1)—Cl(1)       | 2.330(19) |
| Pd(1)—Cl(2)       | 2.375(19) | Pd(1)—Te(1)       | 2.504(8)  |
| C(9)—C(8)         | 1.525(10) | C(9)—S(1)         | 1.832(7)  |
| C(5)—C(6)         | 1.353(10) | C(5)—C(4)         | 1.358(11) |
| C(5)—Te(1)        | 2.128(7)  | C(8)—Te(1)        | 2.117(7)  |
| C(6)—C(7)         | 1.403(11) | C(7)—C2           | 1.374(12) |
| C(2)—O(1)         | 1.357(10) | C(2)—C(3)         | 1.364(12) |
| C(4)—C(3)         | 1.367(12) | C(10)—C(11)       | 1.365(13) |
| C(10)—C(15)       | 1.367(12) | C(10)—S(1)        | 1.779(8)  |
| C(11)—C(12)       | 1.384(13) | C(1)—O(1)         | 1.417(11) |
| C(14)—C(13)       | 1.34(2)   | C(14)—C(15)       | 1.401(17) |
| C(13)—C(12)       | 1.34(2)   |                   |           |
| Bond Angle (°)    |           |                   |           |
| S(1)—Pd(1)—Cl(1)  | 175.48(8) | S(1)—Pd(1)—Cl(2)  | 90.05(7)  |
| Cl(1)—Pd(1)—Cl(2) | 93.70(8)  | S(1)—Pd(1)—Te(1)  | 89.97(5)  |
| Cl(1)—Pd(1)—Te(1) | 86.19(6)  | Cl(2)—Pd(1)—Te(1) | 177.90(5) |
| C(10)—S(1)—C(9)   | 101.5(4)  | C(10)—S(1)—Pd(1)  | 108.3(3)  |
| C(9)—S(1)—Pd(1)   | 107.5(2)  | C(8)—Te(1)—C(5)   | 95.3(3)   |
| C(8)—Te(1)—Pd(1)  | 96.1(2)   | C(5)—Te(1)—Pd(1)  | 98.11(18) |
| C(8)—C(9)—S(1)    | 108.7(5)  | C(6)—C(5)—C(4)    | 118.7(7)  |
| C(6)—C(5)—Te(1)   | 118.1(5)  | C(4)—C(5)—Te(1)   | 123.2(6)  |
| C(9)—C(8)—Te(1)   | 111.4(5)  | C(5)—C(6)—C(7)    | 120.4(8)  |
| C(2)—C(7)—C(6)    | 120.2(9)  | O(1)—C(2)—C(3)    | 118.3(8)  |
| O(1)—C(2)—C(7)    | 123.4(9)  | C(3)—C(2)—C(7)    | 118.3(8)  |
| C(5)—C(4)—C(3)    | 121.7(9)  | C(11)—C(10)—C(15) | 121.8(9)  |
| C(11)—C(10)—S(1)  | 122.0(7)  | C(15)—C(10)—S(1)  | 116.1(8)  |
| C(10)—C(11)—C(12) | 117.1(11) | C(2)—C(3)—C(4)    | 120.7(9)  |
| C(13)—C(14)—C(15) | 120.1(15) | C(10)—C(15)—C(14) | 118.4(13) |
| C(12)—C(13)—C(14) | 120.1(13) | C(13)—C(12)—C(11) | 122.4(14) |
| C(2)—O(1)—C(1)    | 118.0(7)  |                   |           |

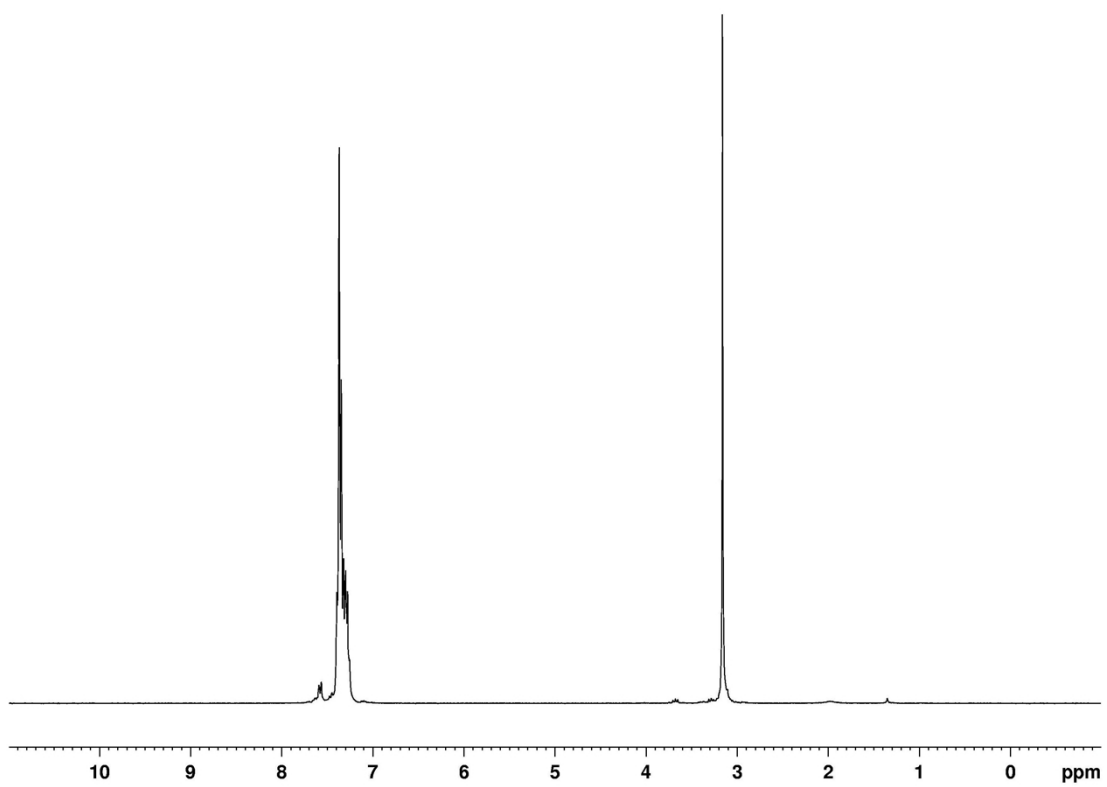

**Fig. S1**  $^1\text{H}$  NMR Spectrum of **L1**

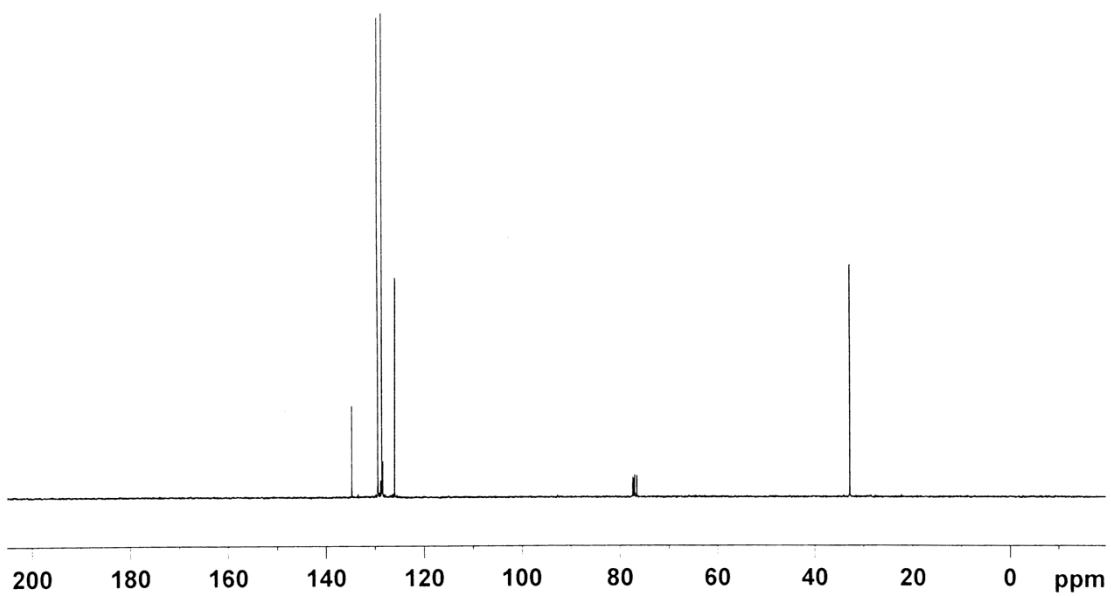

**Fig. S2**  $^{13}\text{C}\{^1\text{H}\}$  NMR Spectrum of **L1**

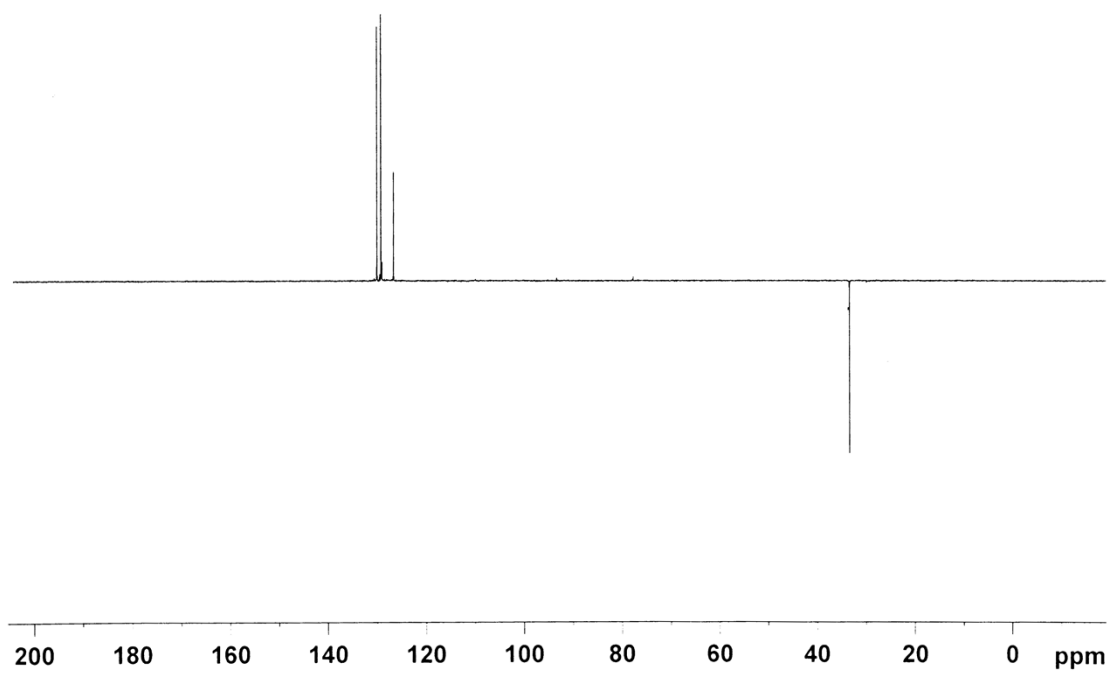

**Fig. S3**  $^{135}\text{DEPT}$  NMR Spectrum of **L1**

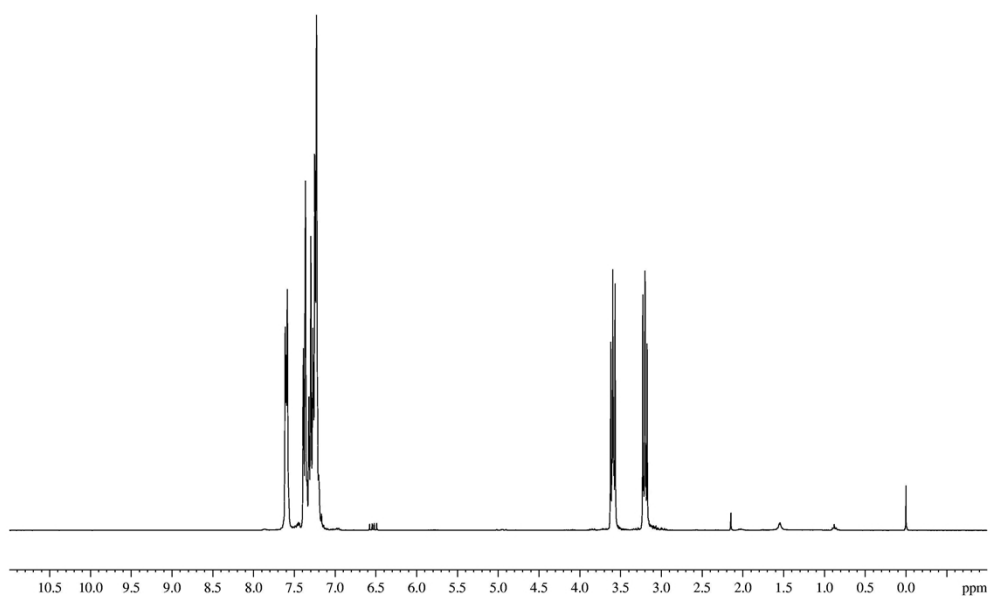

**Fig. S4**  $^1\text{H}$  NMR Spectrum of **L2**

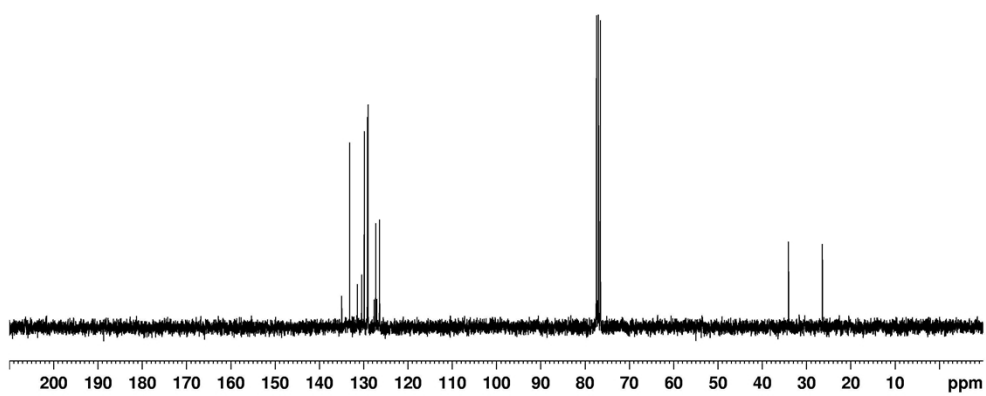

**Fig. S5**  $^{13}\text{C}\{^1\text{H}\}$  NMR Spectrum of **L2**

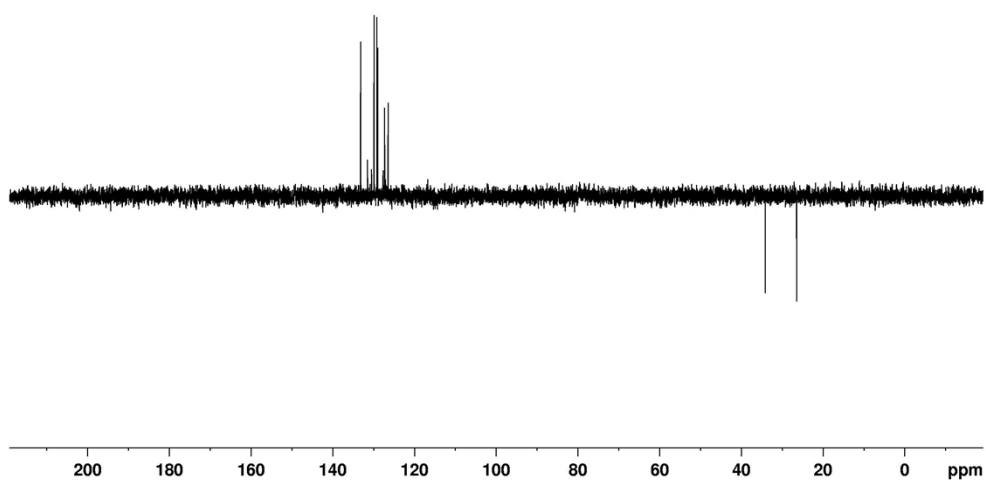

**Fig. S6**  $^{135}\text{DEPT}$  NMR Spectrum of **L2**

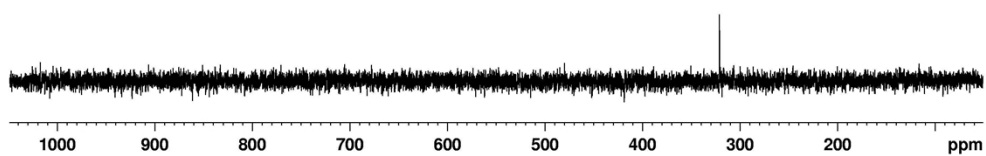

**Fig. S7**  $^{77}\text{Se}\{^1\text{H}\}$  NMR Spectrum of **L2**

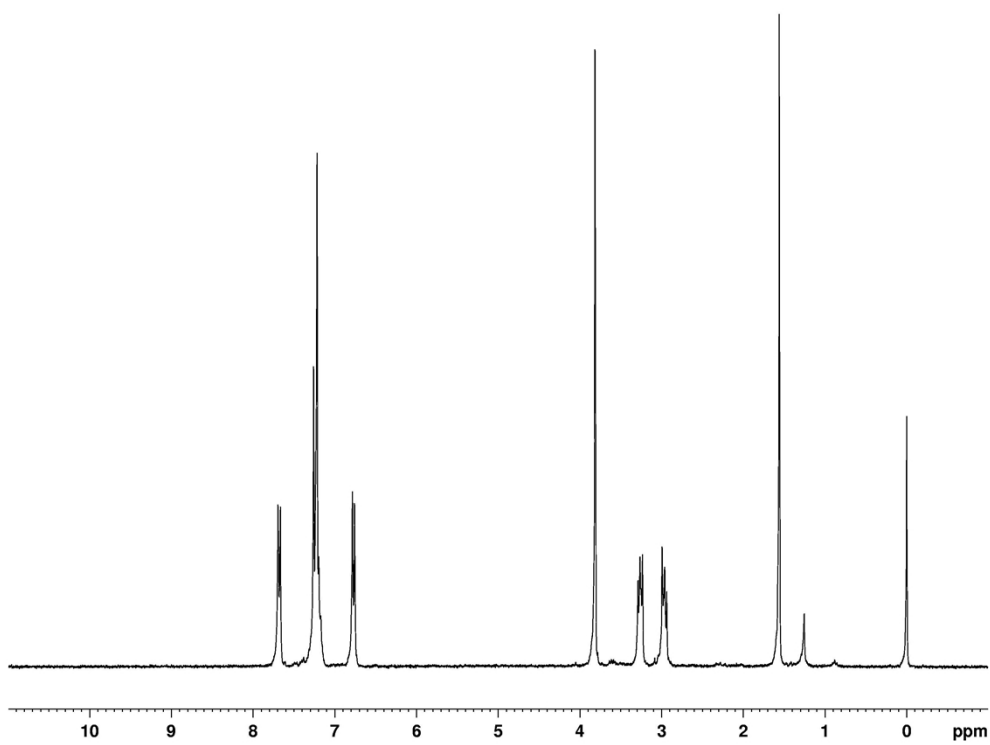

**Fig. S8**  $^1\text{H}$  NMR Spectrum of **L3**

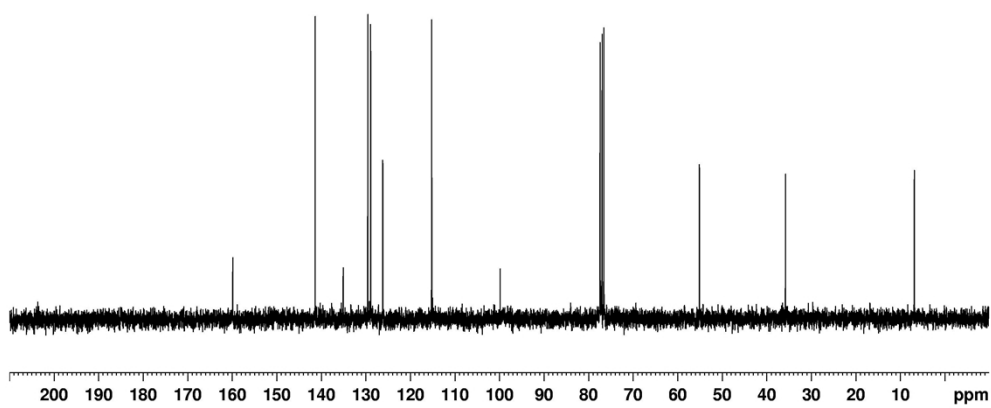

**Fig. S9**  $^{13}\text{C}\{^1\text{H}\}$  NMR Spectrum of L3

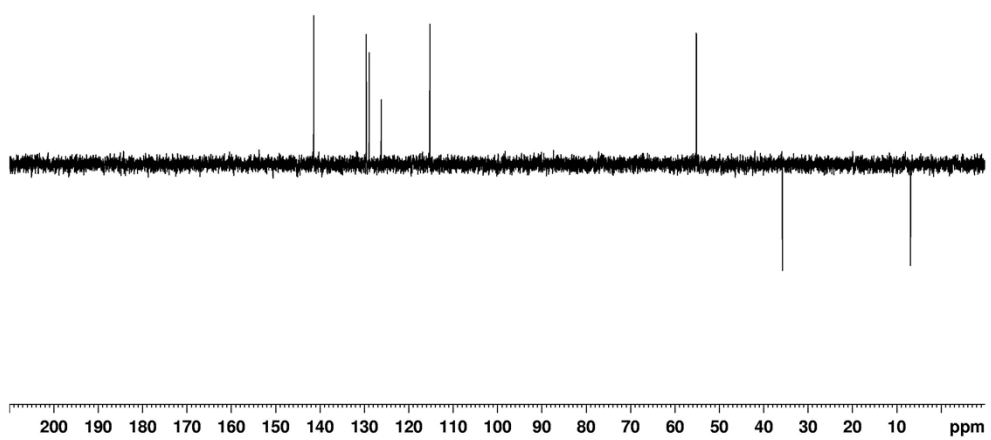

**Fig. S10**  $^{135}\text{DEPT}$  NMR Spectrum of L3



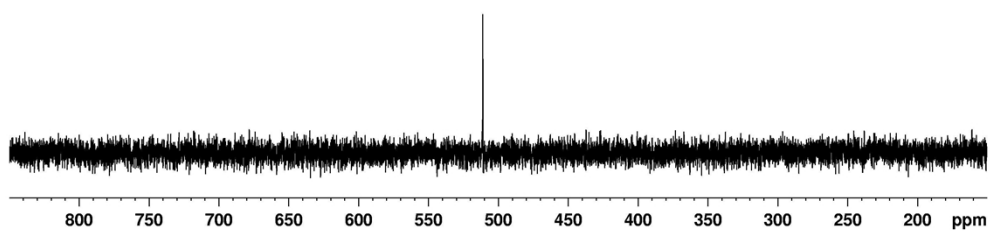

**Fig. S11**  $^{125}\text{Te}\{^1\text{H}\}$  NMR Spectrum of L3

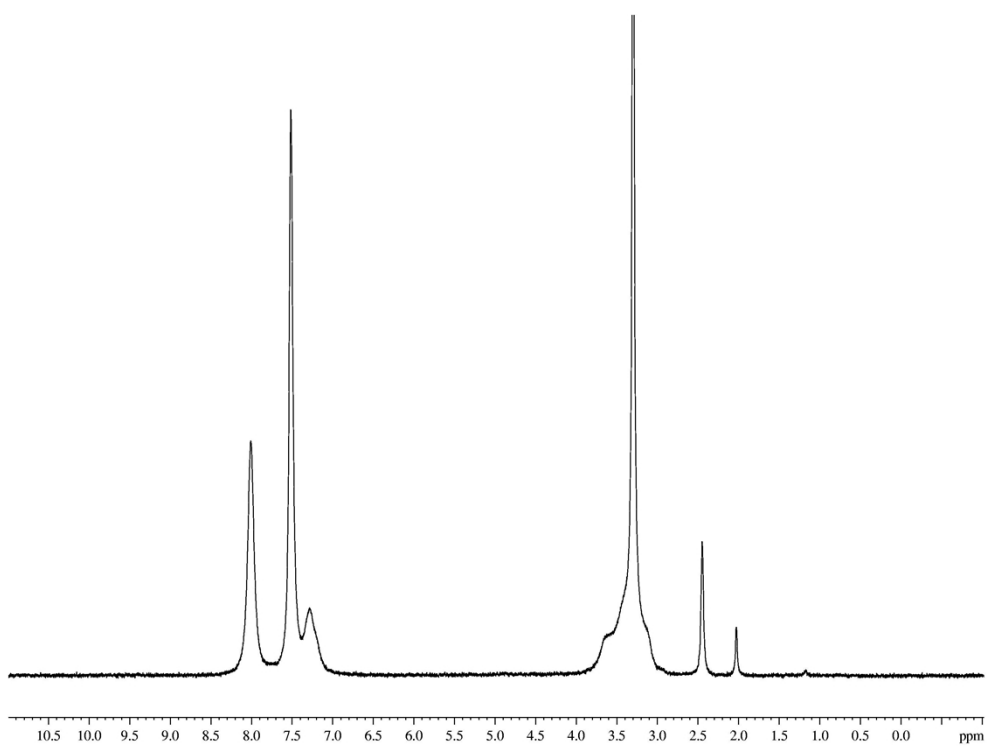

**Fig. S12**  $^1\text{H}$  NMR Spectrum of 1

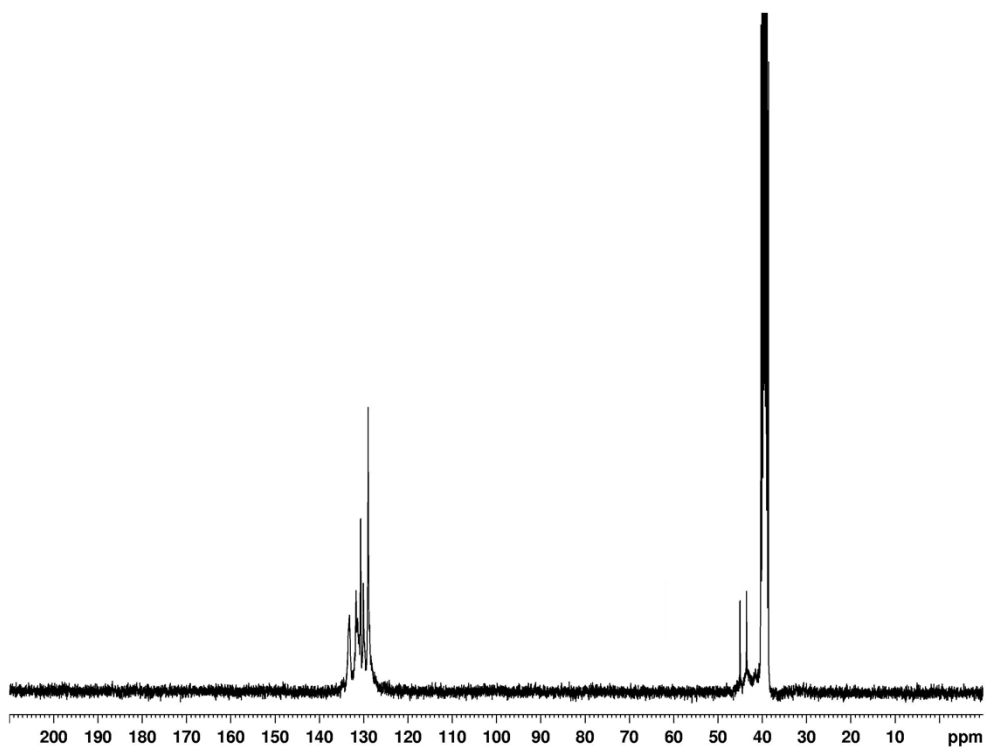

**Fig. S13**  $^{13}\text{C}\{^1\text{H}\}$  NMR Spectrum of **1**

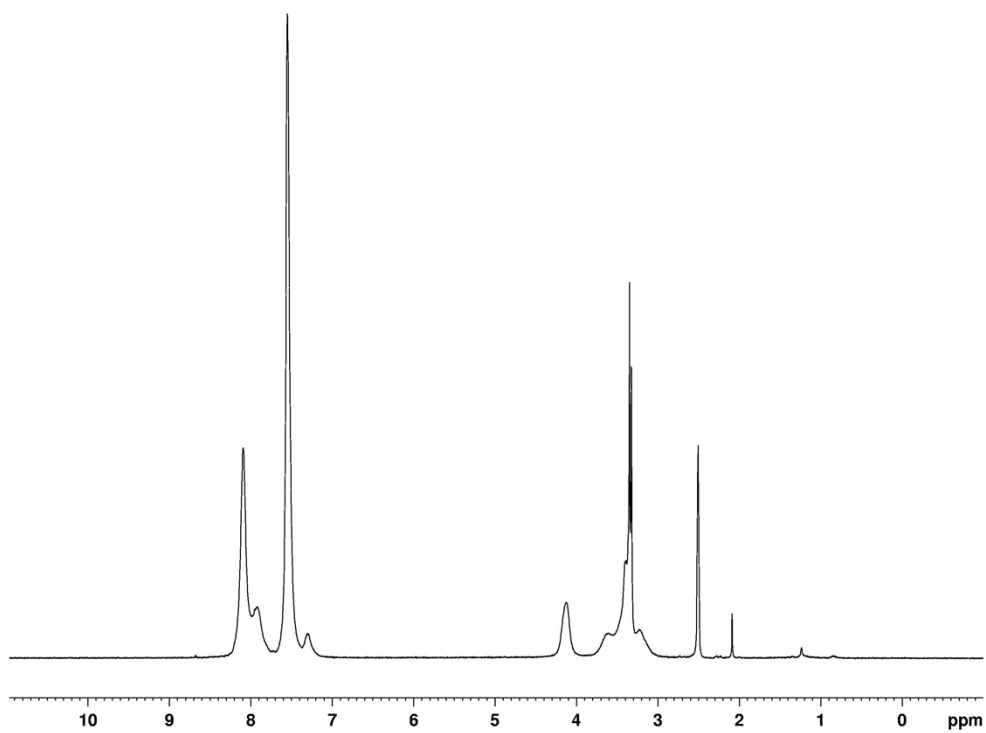

**Fig. S14**  $^1\text{H}$  NMR Spectrum of **2**

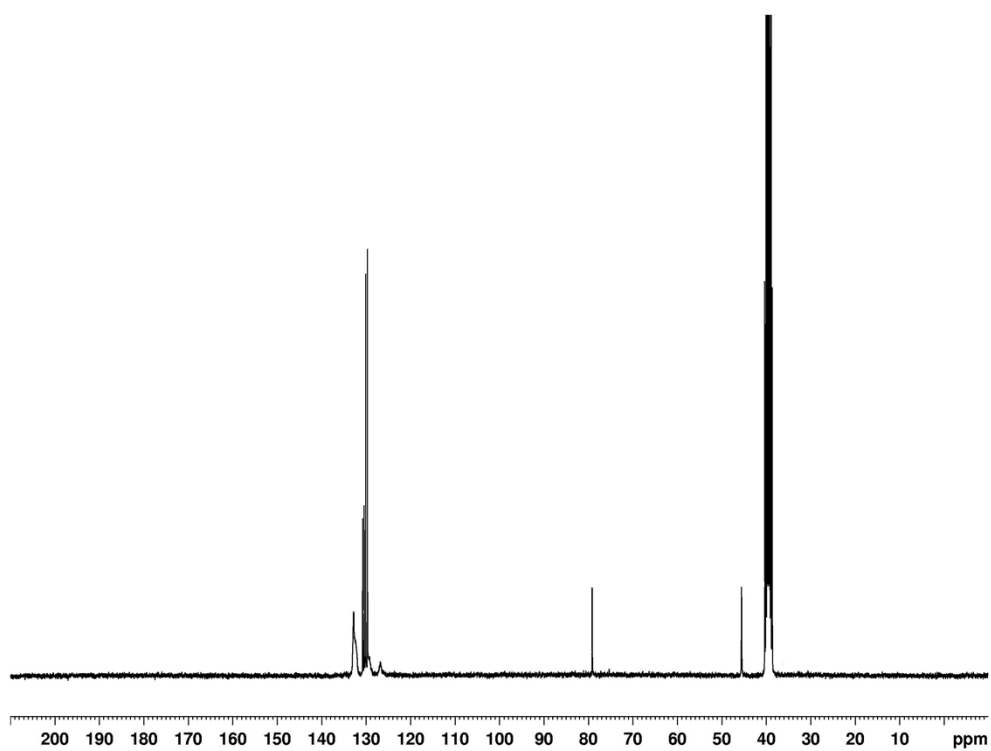

**Fig. S15**  $^{13}\text{C}\{^1\text{H}\}$  NMR Spectrum of **2**

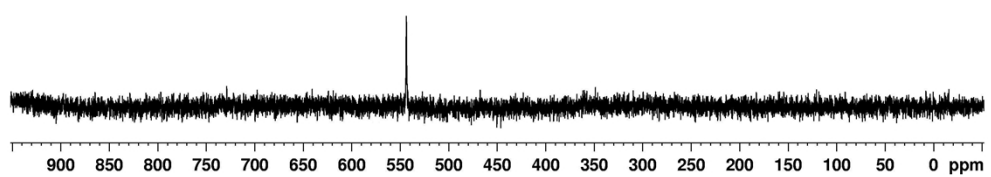

**Fig. S16**  $^{77}\text{Se}\{^1\text{H}\}$  NMR Spectrum of **2**

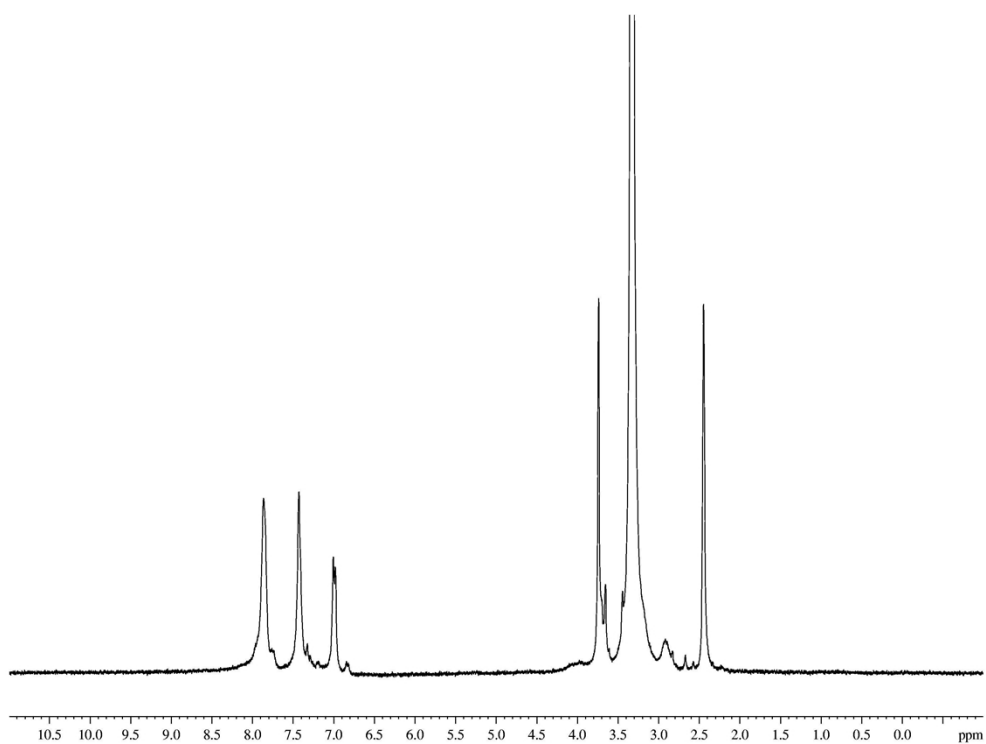

**Fig. S17**  $^1\text{H}$  NMR Spectrum of **3**

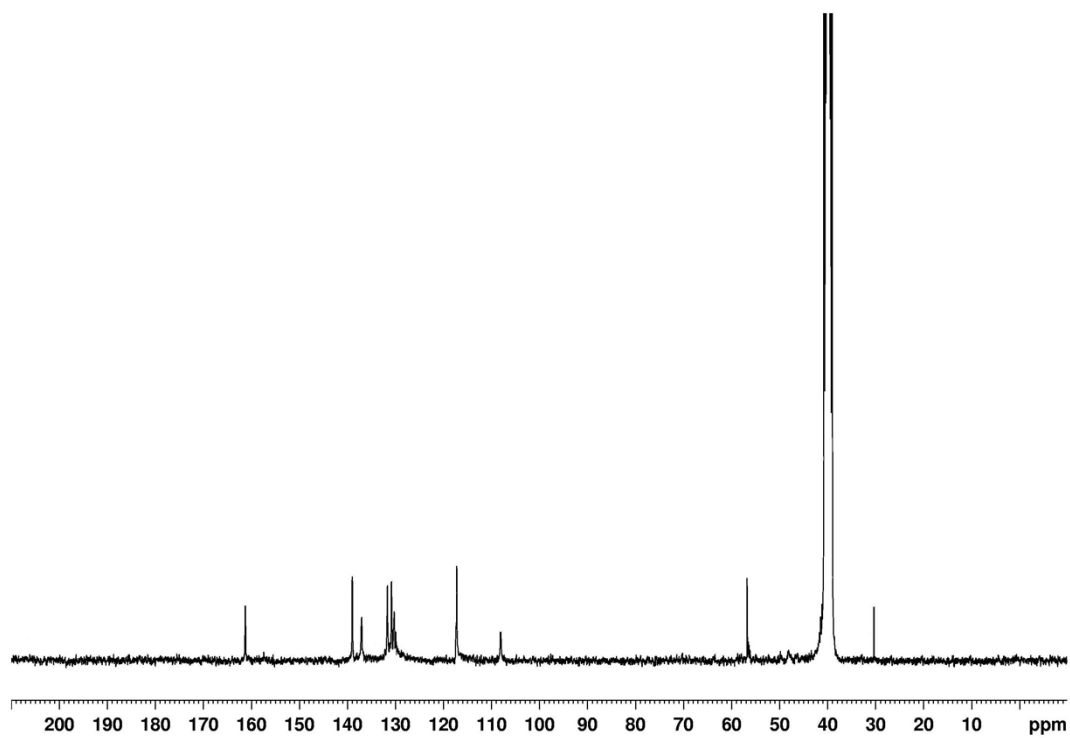

**Fig. S18**  $^{13}\text{C}\{^1\text{H}\}$  NMR Spectrum of **3**

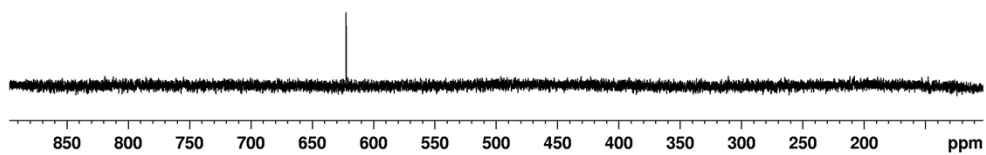

**Fig. S19**  $^{125}\text{Te}\{^1\text{H}\}$  NMR Spectrum of **3**

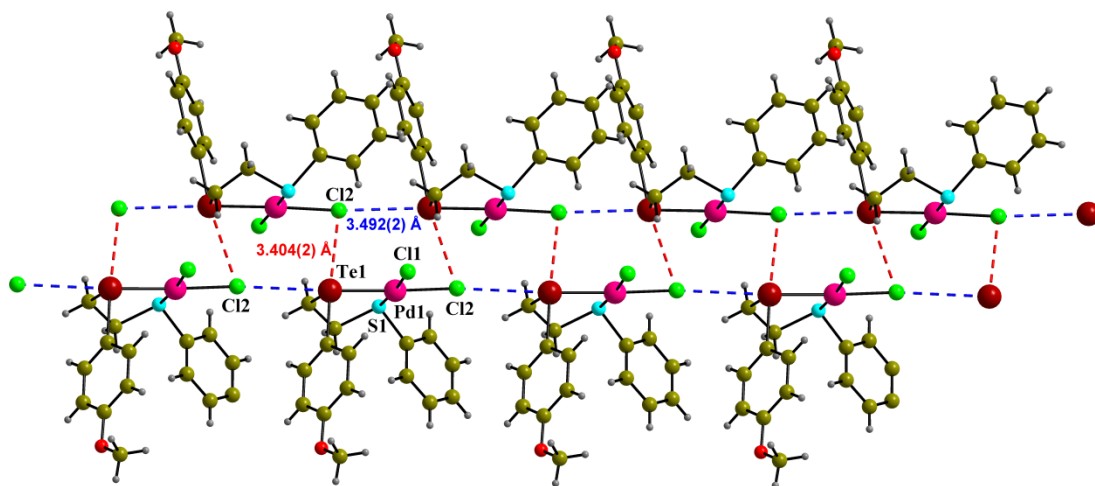

**Fig. S20** Molecular Packing of **3** showing Cl...Te Interaction

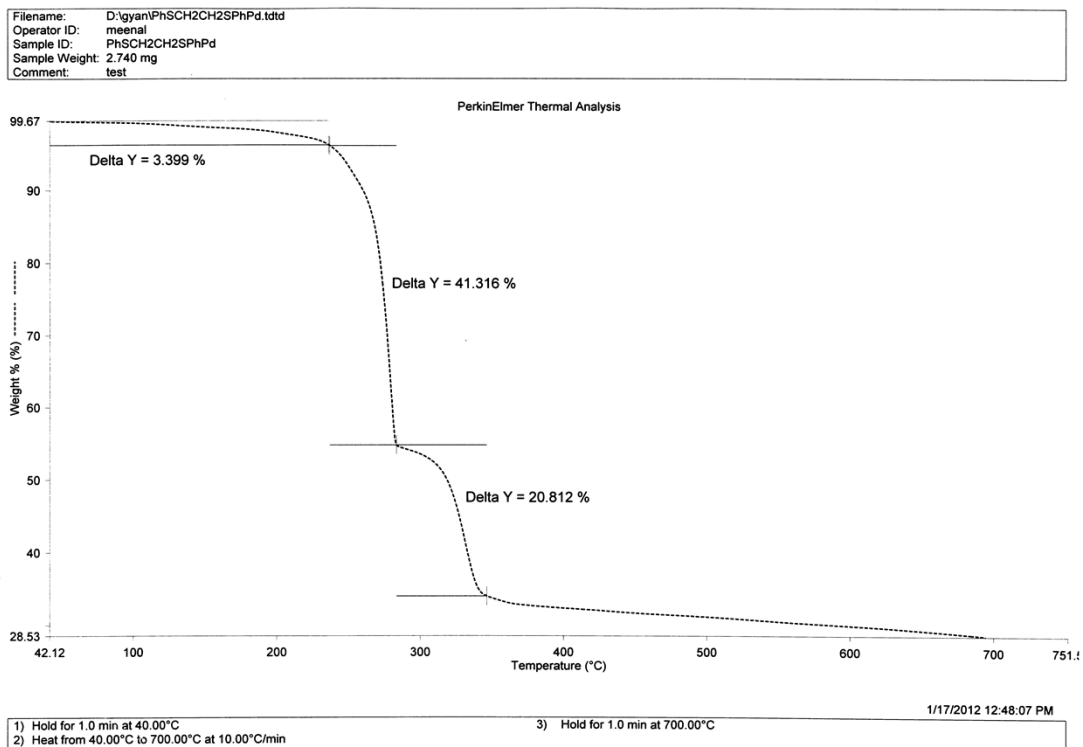

**Fig. S21** TGA Spectrum of **1**

Filename: D:\gyan\S Se Pd complex.tdtd  
Operator ID: Gyan  
Sample ID: S Se Pd complex  
Sample Weight: 5.002 mg  
Comment: test

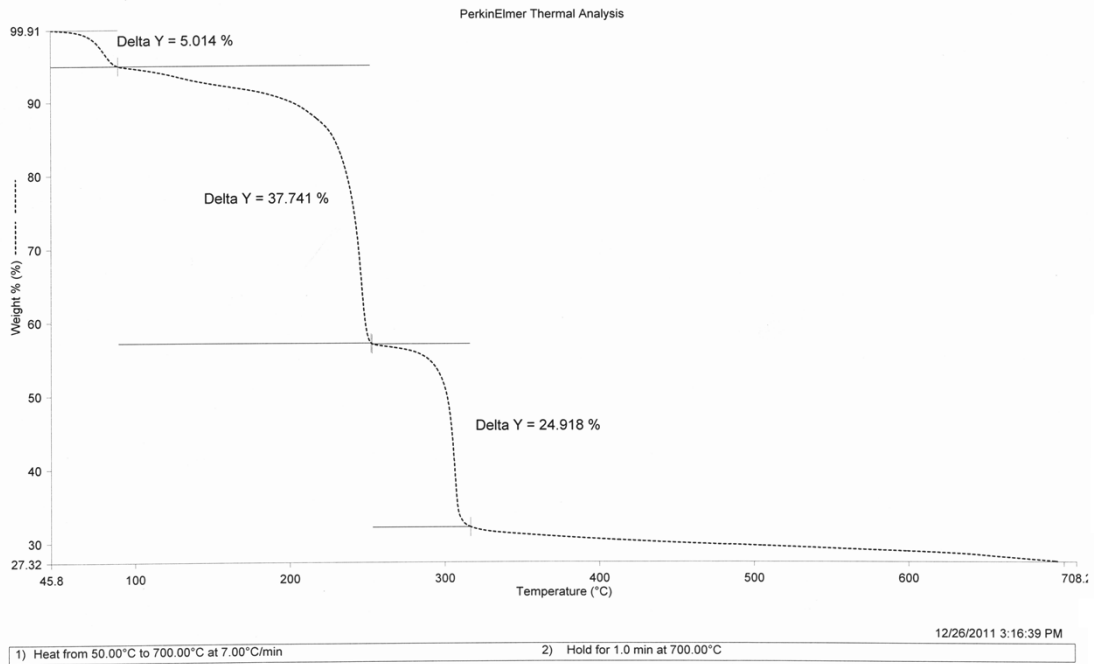

Fig. S22 TGA Spectrum of 2

Filename: D:\gyan\S Te Pd complex.tdtd  
Operator ID: Gyan  
Sample ID: S Te Pd complex  
Sample Weight: 8.617 mg  
Comment: test

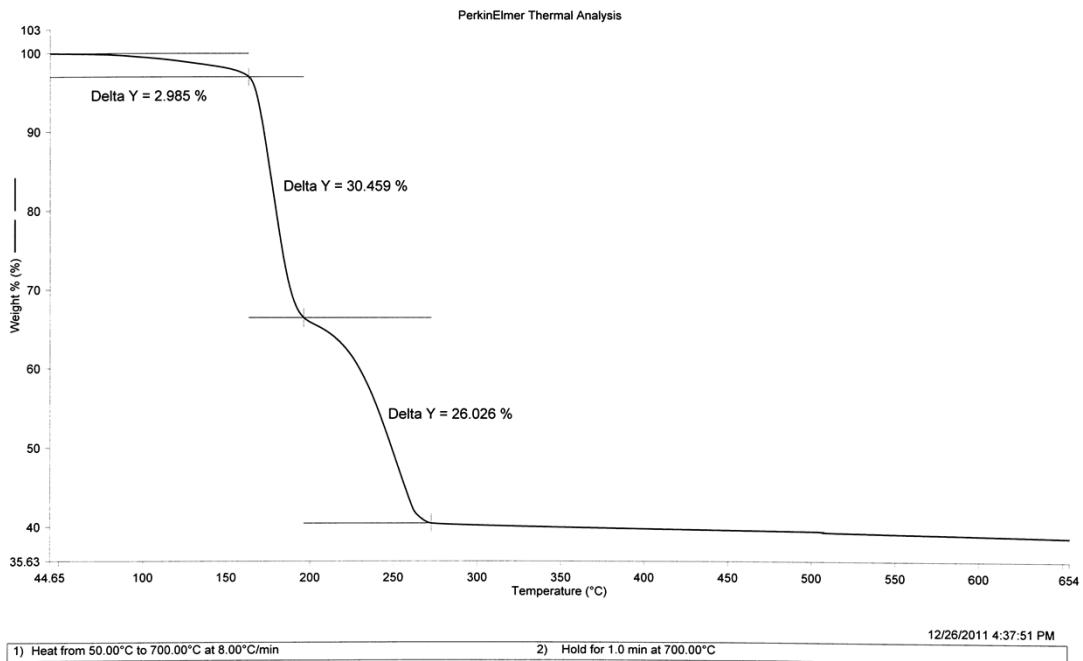

Fig. S23 TGA Spectrum of 3

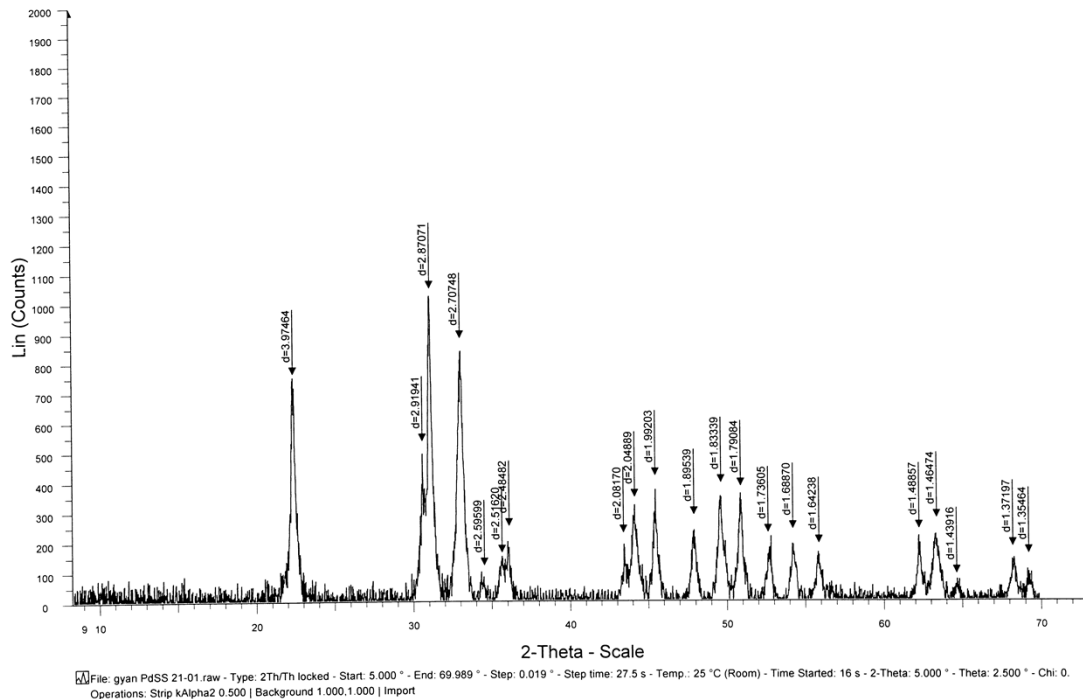

Fig. S24 PXRD of PdP<sub>2</sub> Nanoparticles Obtained from 1

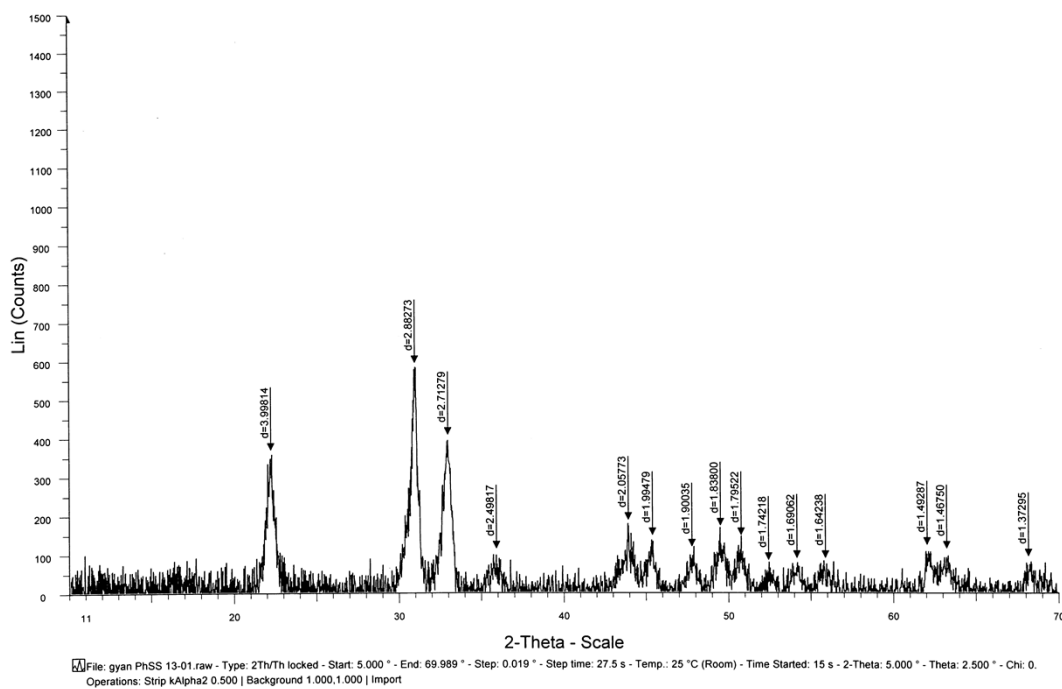

Fig. S25 PXRD of PdP<sub>2</sub> Nanoparticles Obtained from 2



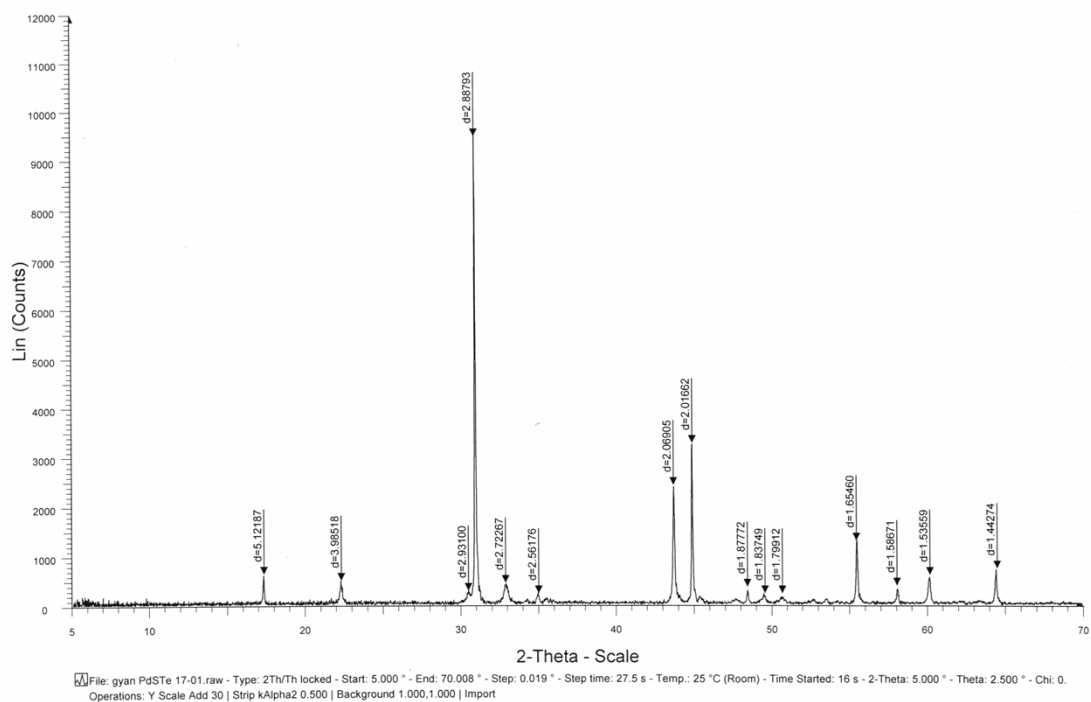

**Fig. S26** PXRD of PdP<sub>2</sub> Nanoparticles Obtained from **3**

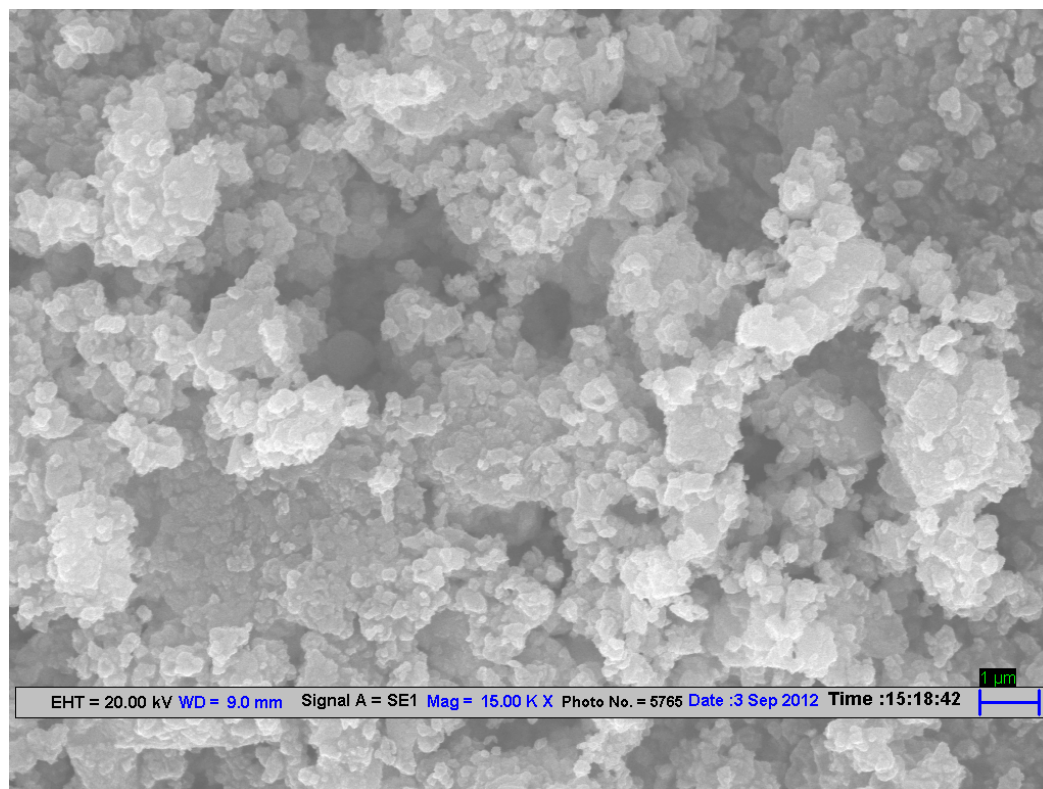

**Fig. S27** SEM Image of Decomposition Product (Pd Nanoparticles Protected by Ligand) of **1** Obtained after Suzuki Coupling Reaction

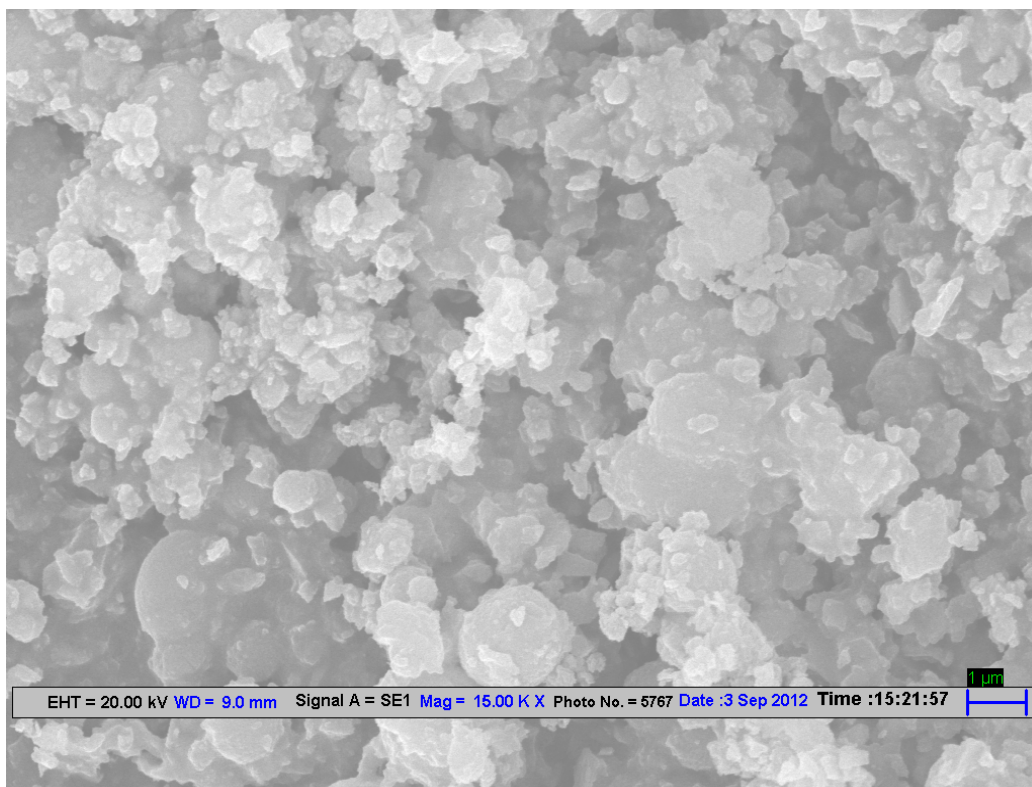

**Fig. S28** SEM Image of Decomposition Product (Pd Nanoparticles Protected by Ligand) of **2** Obtained after Suzuki Coupling Reaction

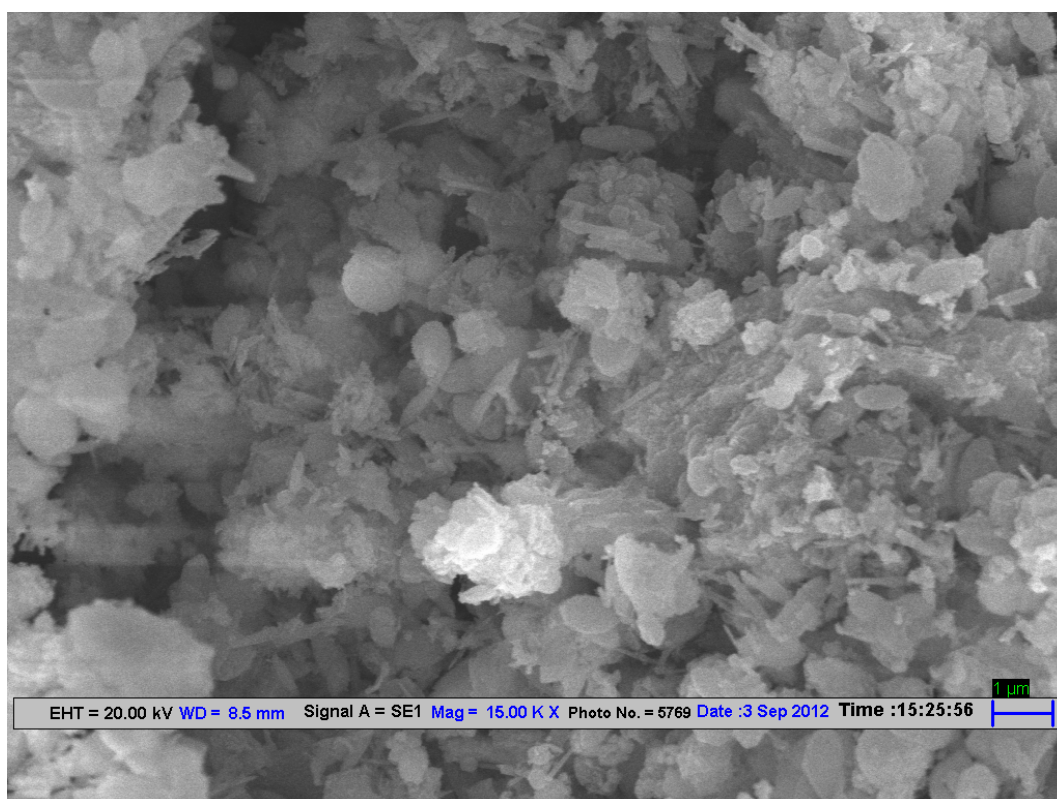

**Fig. S29** SEM Image of Decomposition Product (Pd Nanoparticles Protected by Ligand) of **3** Obtained after Suzuki Coupling Reaction

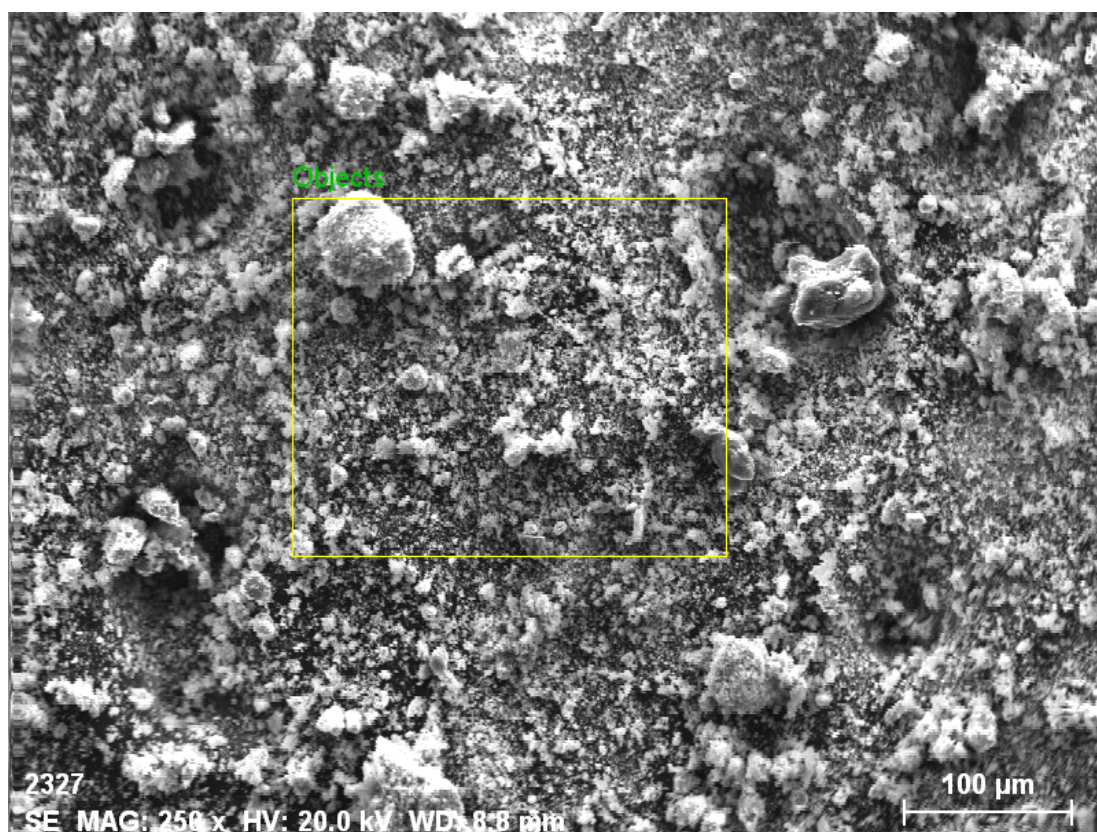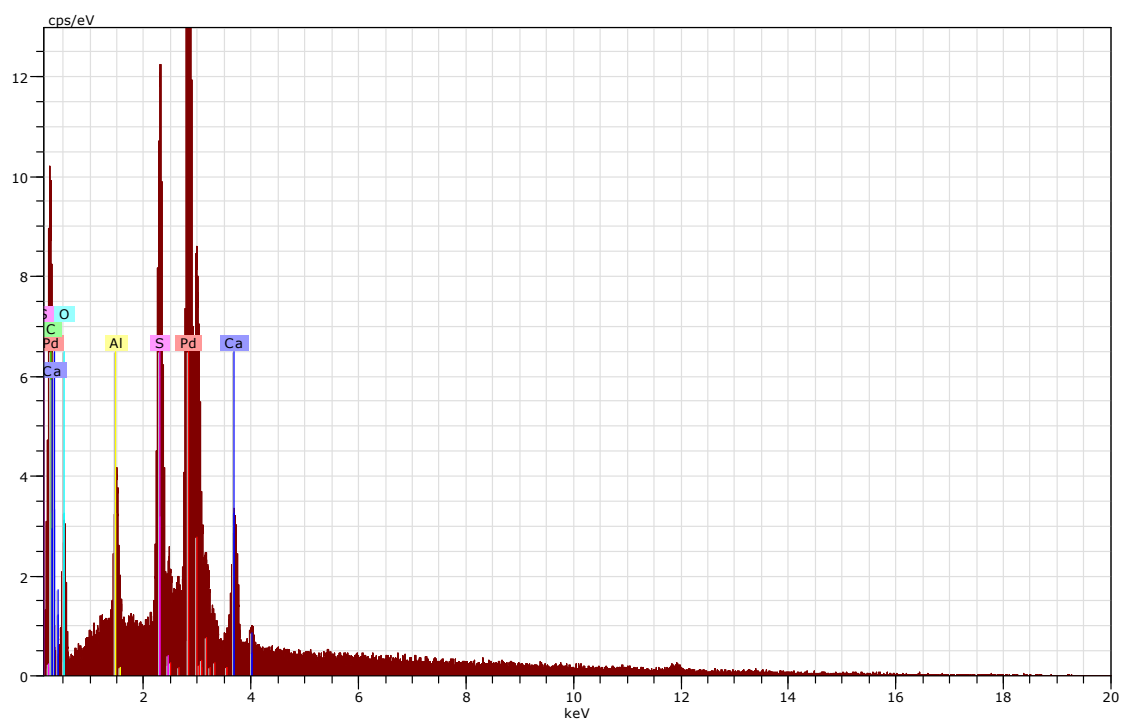

**Fig. S30** SEM-EDX of Decomposition Product (Pd nanoparticles protected by Ligand) of **1** Obtained after Suzuki Coupling Reaction

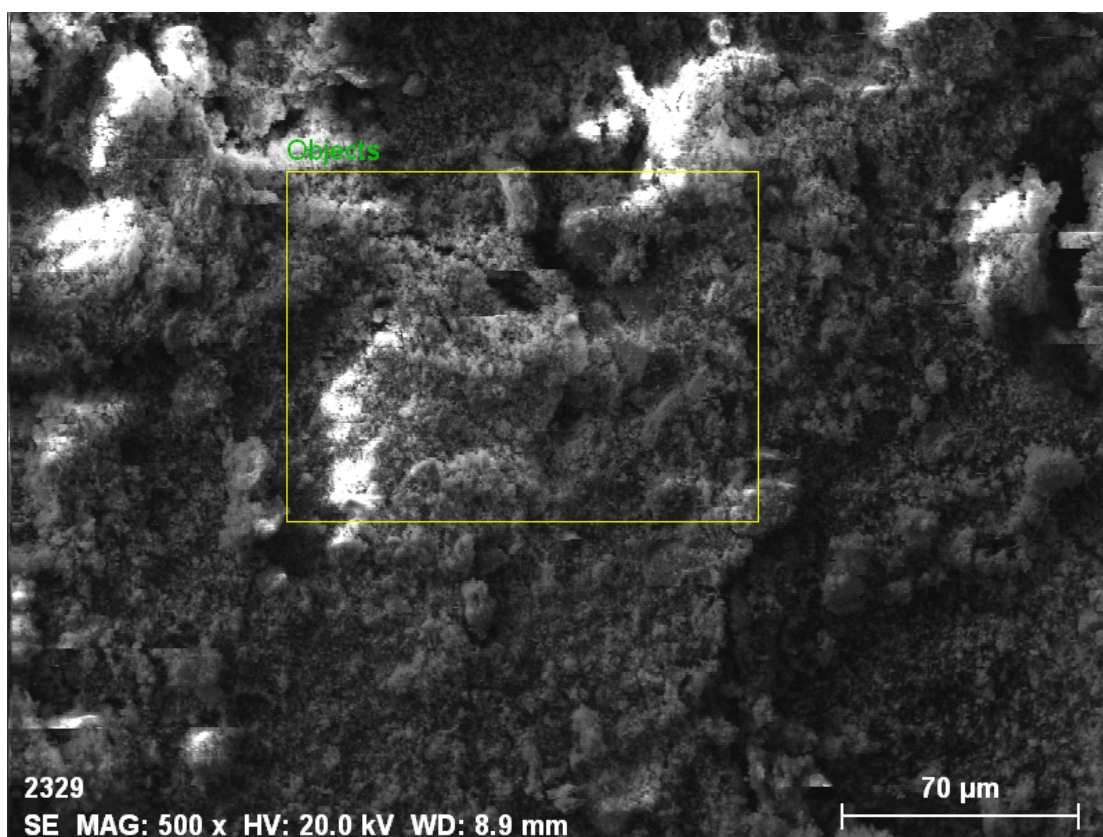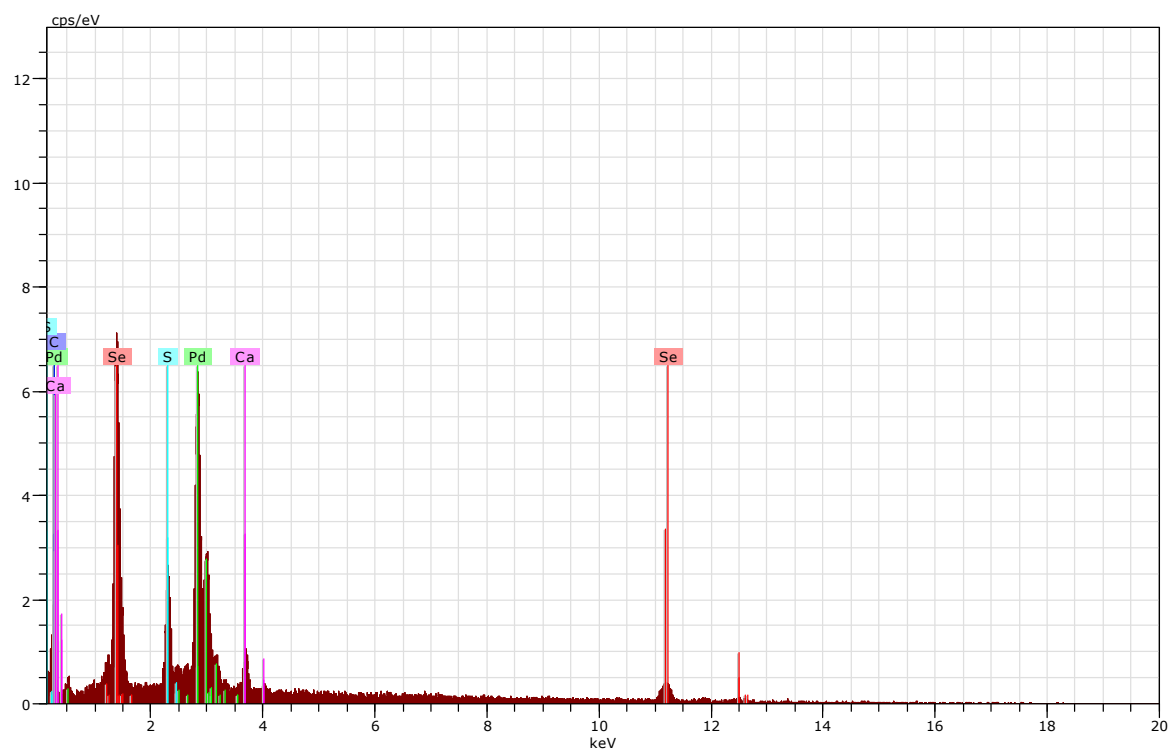

**Fig. S31** SEM-EDX of Decomposition Product (Pd nanoparticles protected by Ligand) of **2** Obtained after Suzuki Coupling Reaction

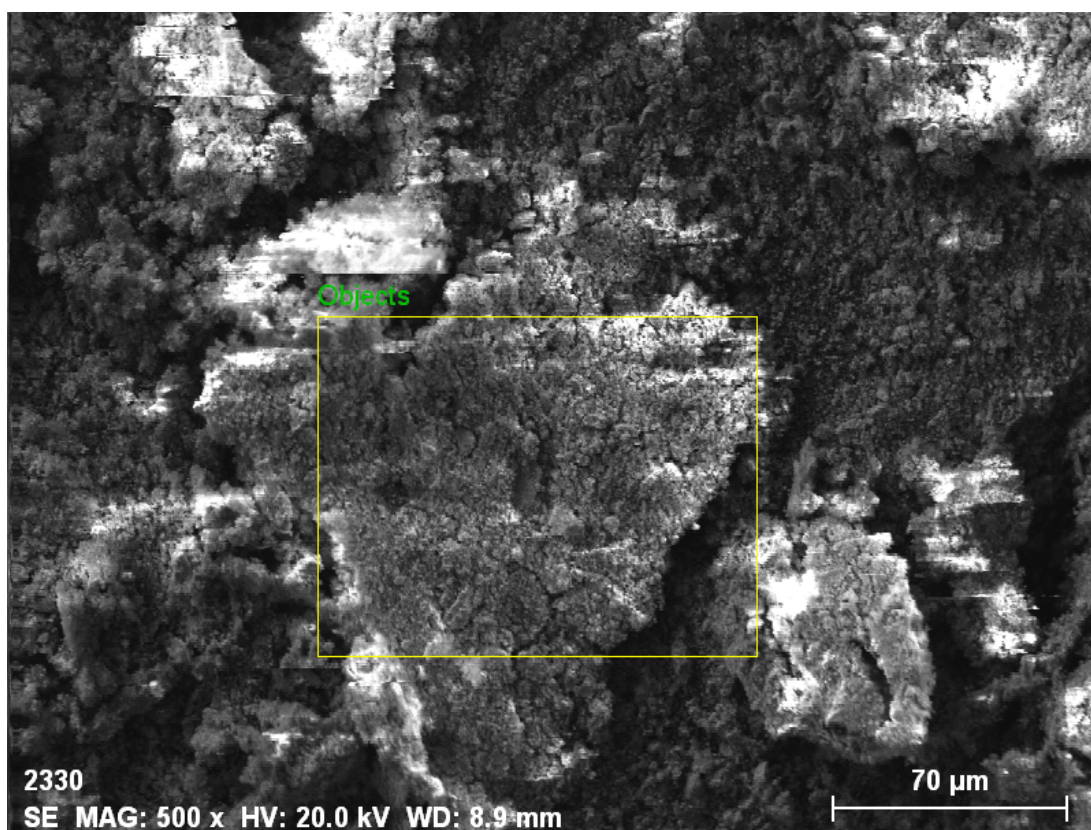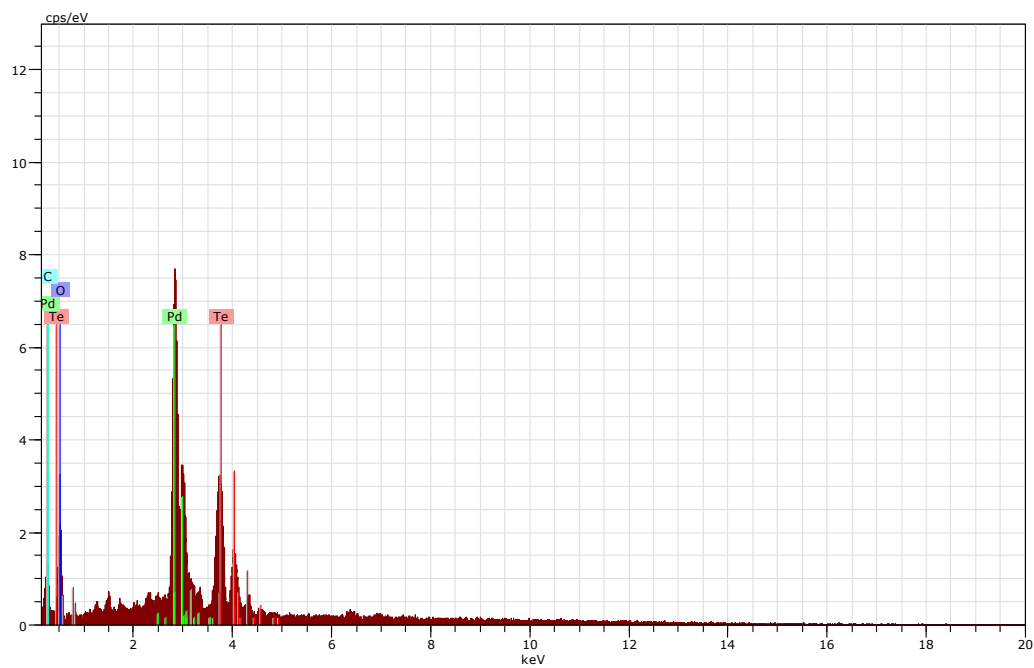

**Fig. S32** SEM-EDX of Decomposition Product (Pd nanoparticles protected by Ligand) of **3** Obtained after Suzuki Coupling Reaction

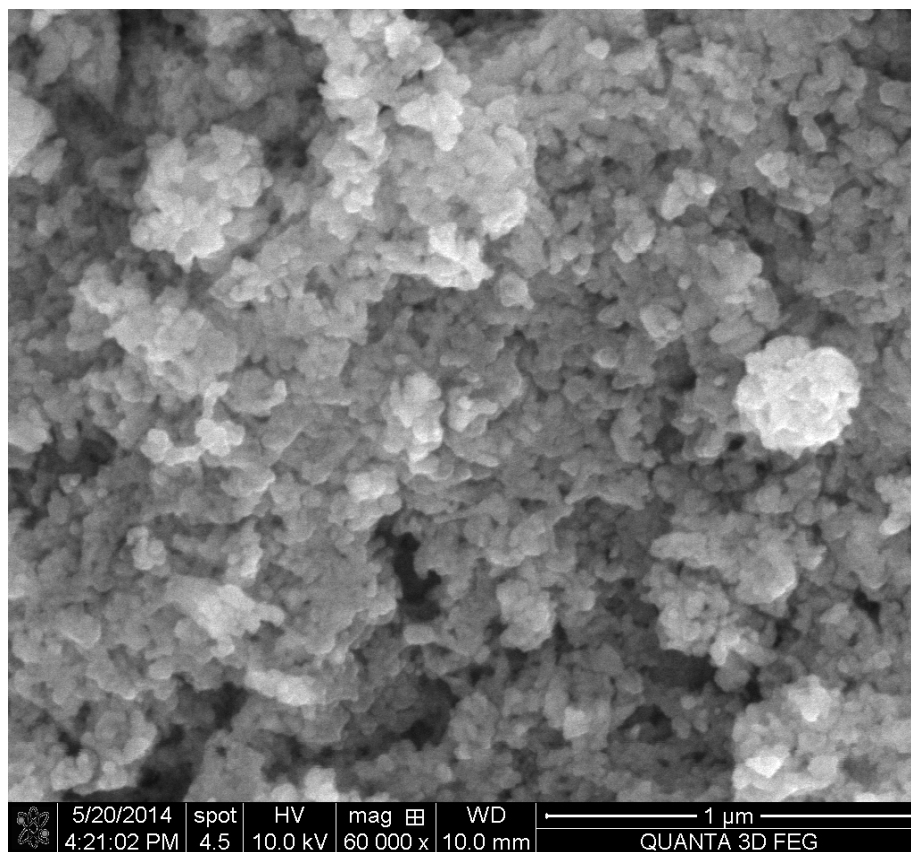

**Fig. S33** FE-SEM image of PdP<sub>2</sub> NPs obtained from complex **1**

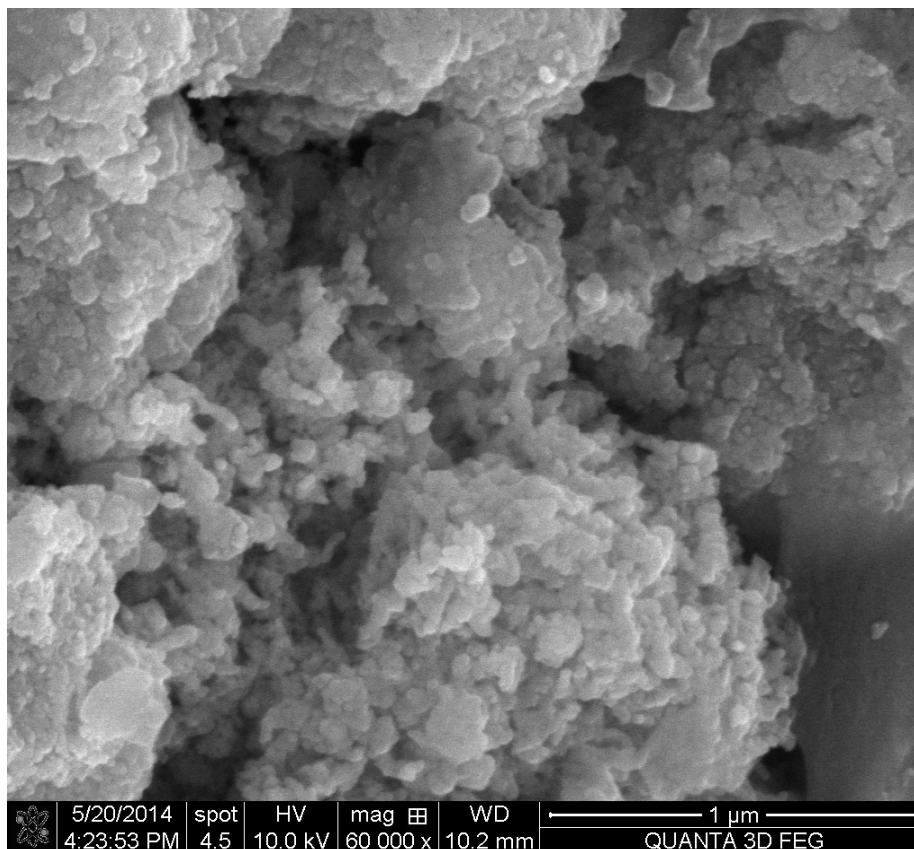

**Fig. S34** FE-SEM image of PdP<sub>2</sub> NPs obtained from complex **2**

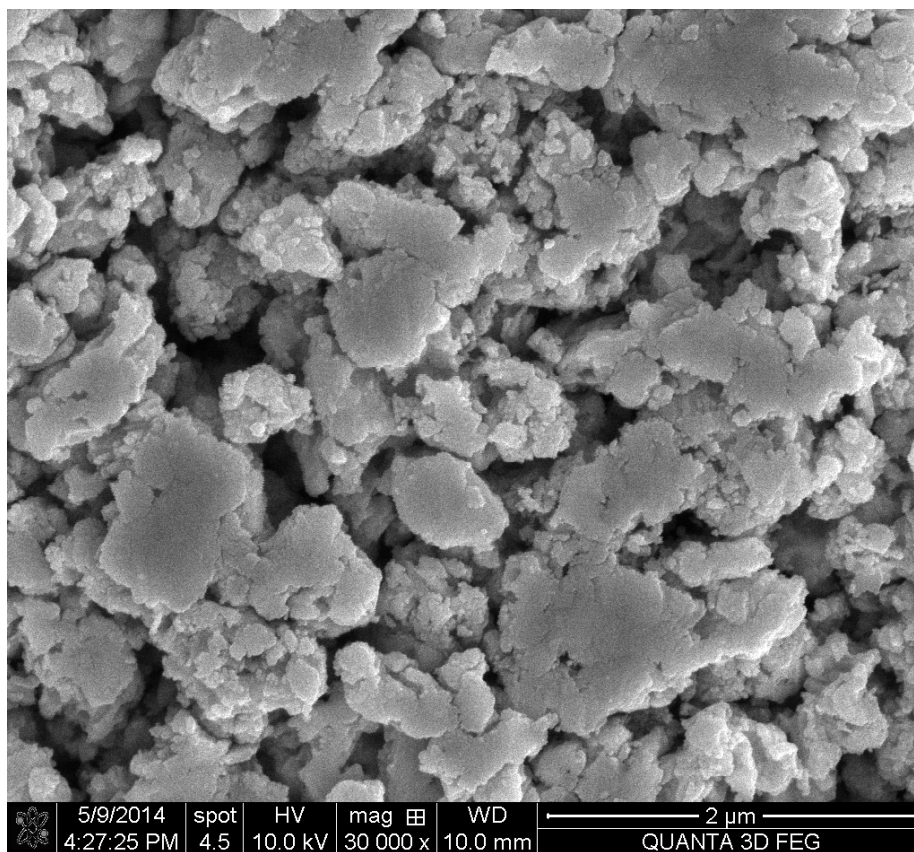

**Fig. S35** FE-SEM image of PdP<sub>2</sub> NPs obtained from complex **3**

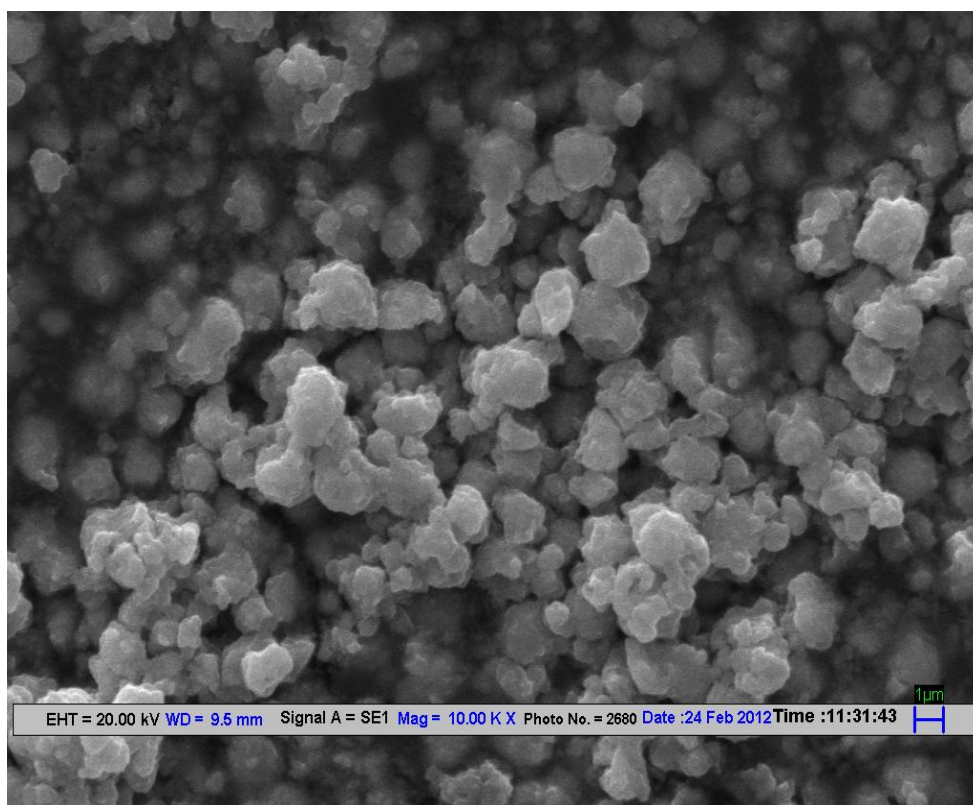

**Fig. S36** SEM Image of PdP<sub>2</sub> Nanoparticles obtained from **1**

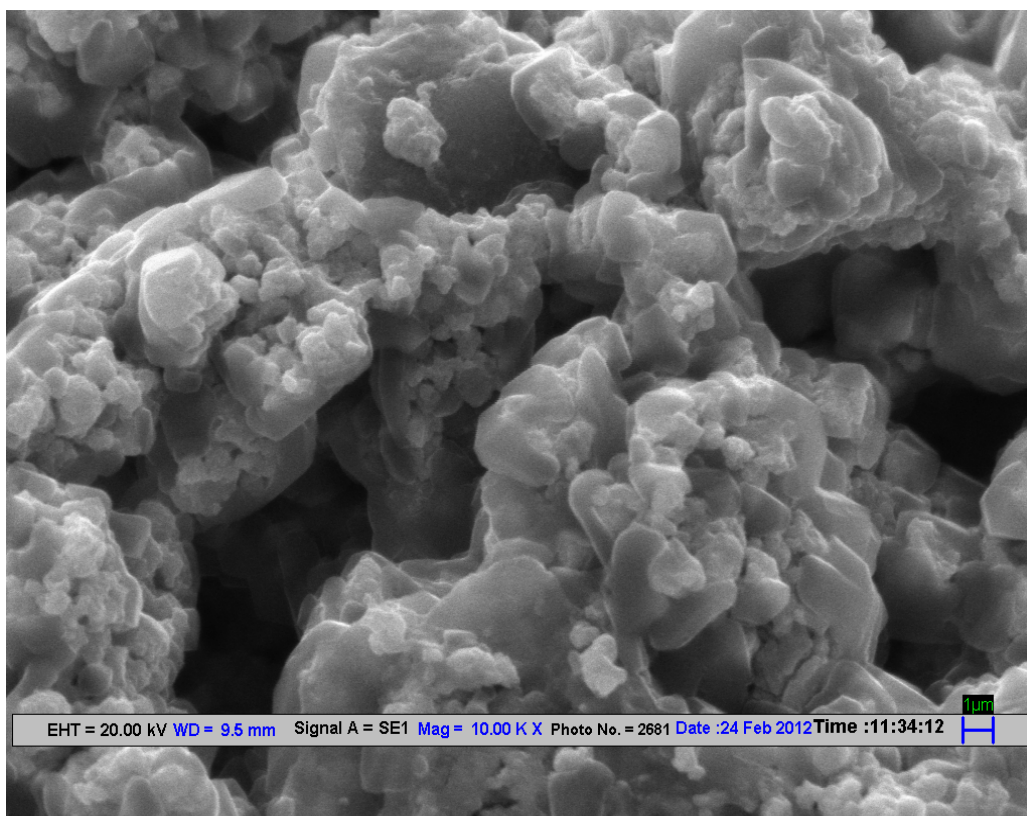

**Fig. S37** SEM Image of PdP<sub>2</sub> Nanoparticles obtained from **2**

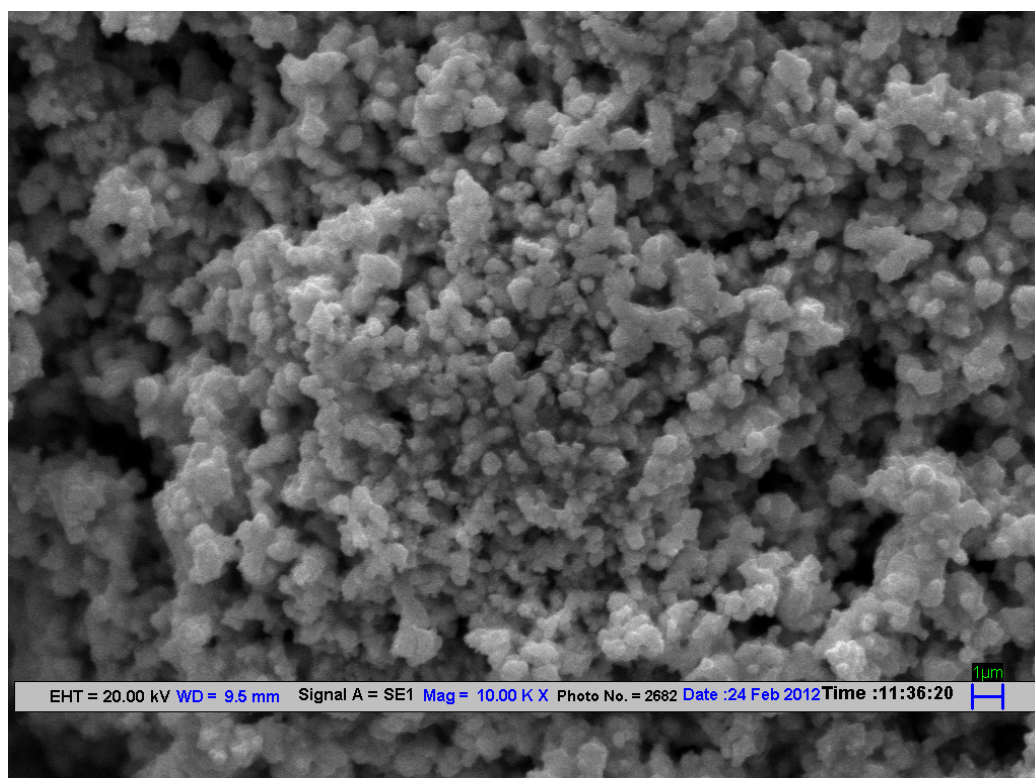

**Fig. S38** SEM Image of PdP<sub>2</sub> Nanoparticles obtained from **3**



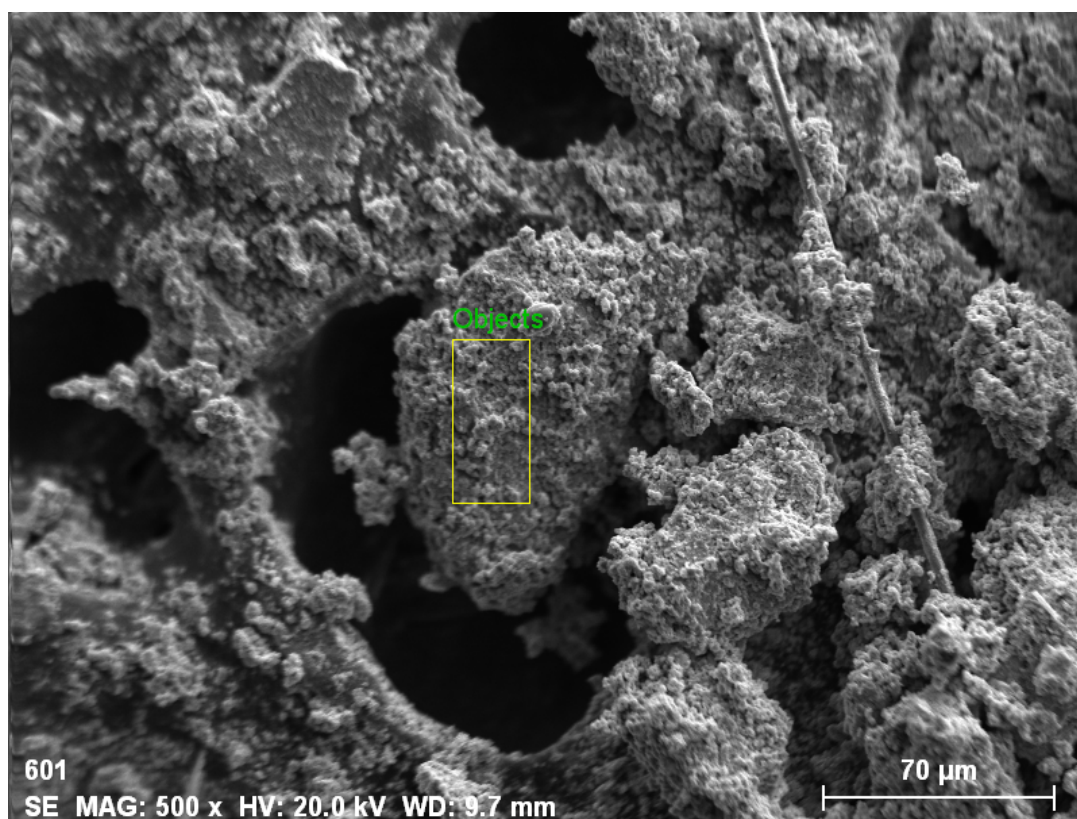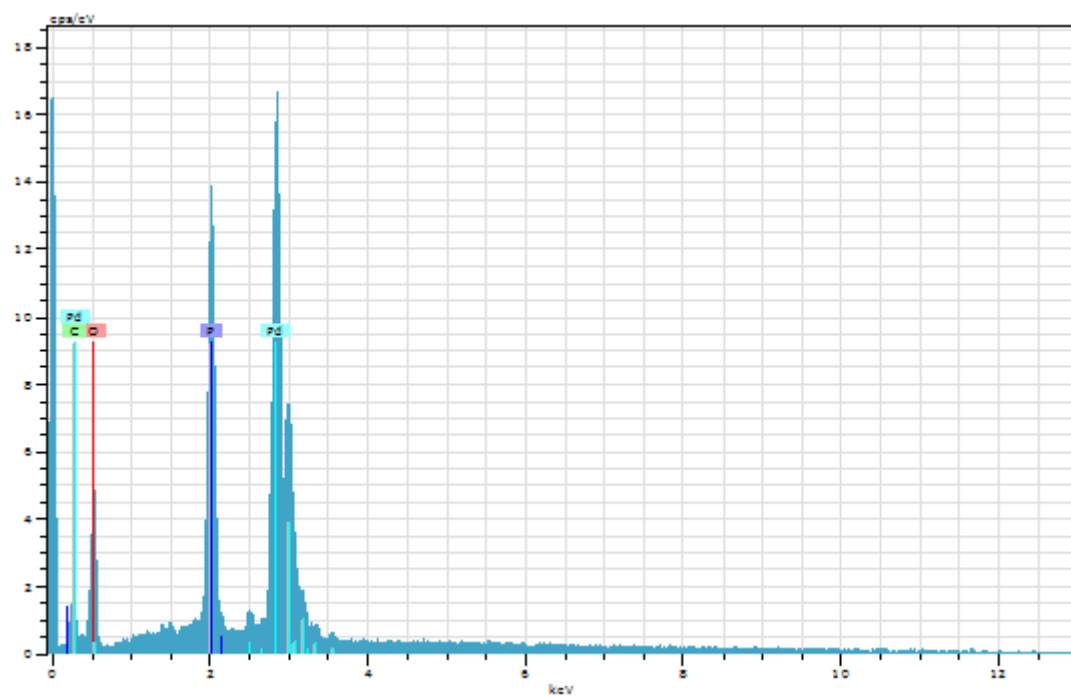

**Fig. S39** SEM EDX of PdP<sub>2</sub> Nanoparticles obtained from **1**

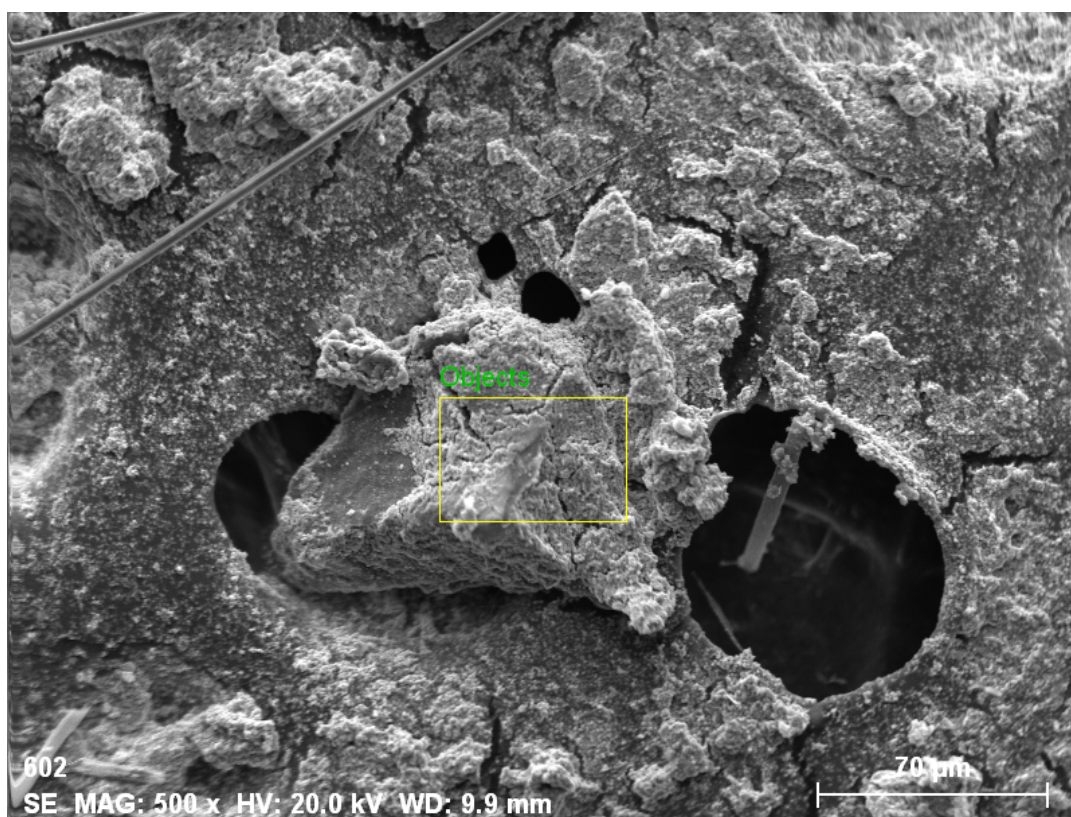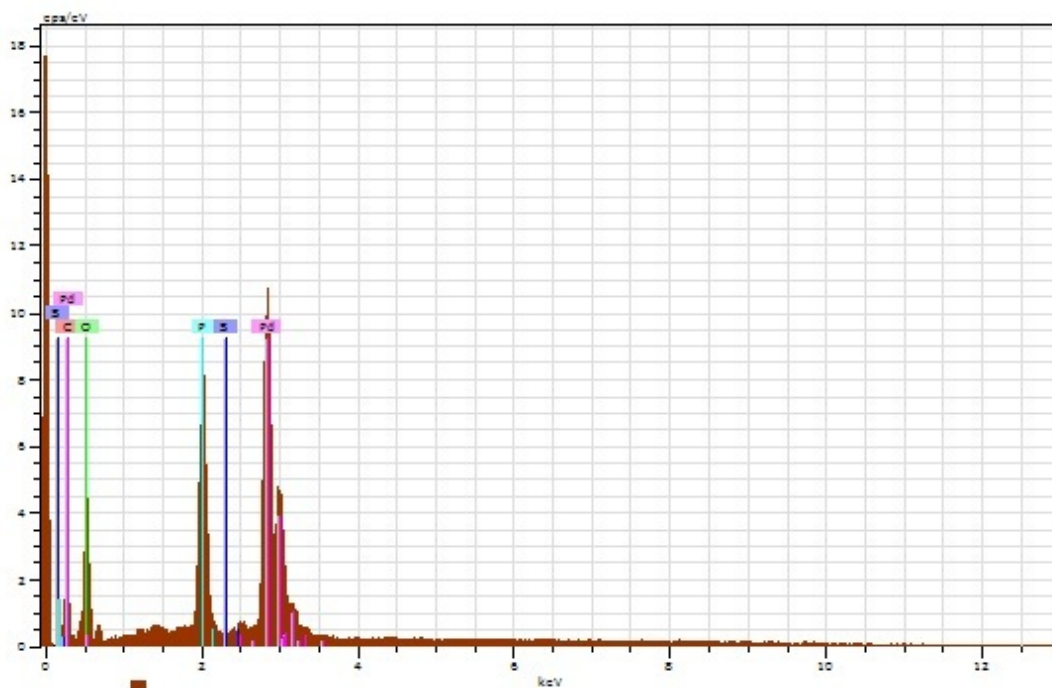

Fig. S40 SEM EDX of PdP<sub>2</sub> Nanoparticles obtained from 2

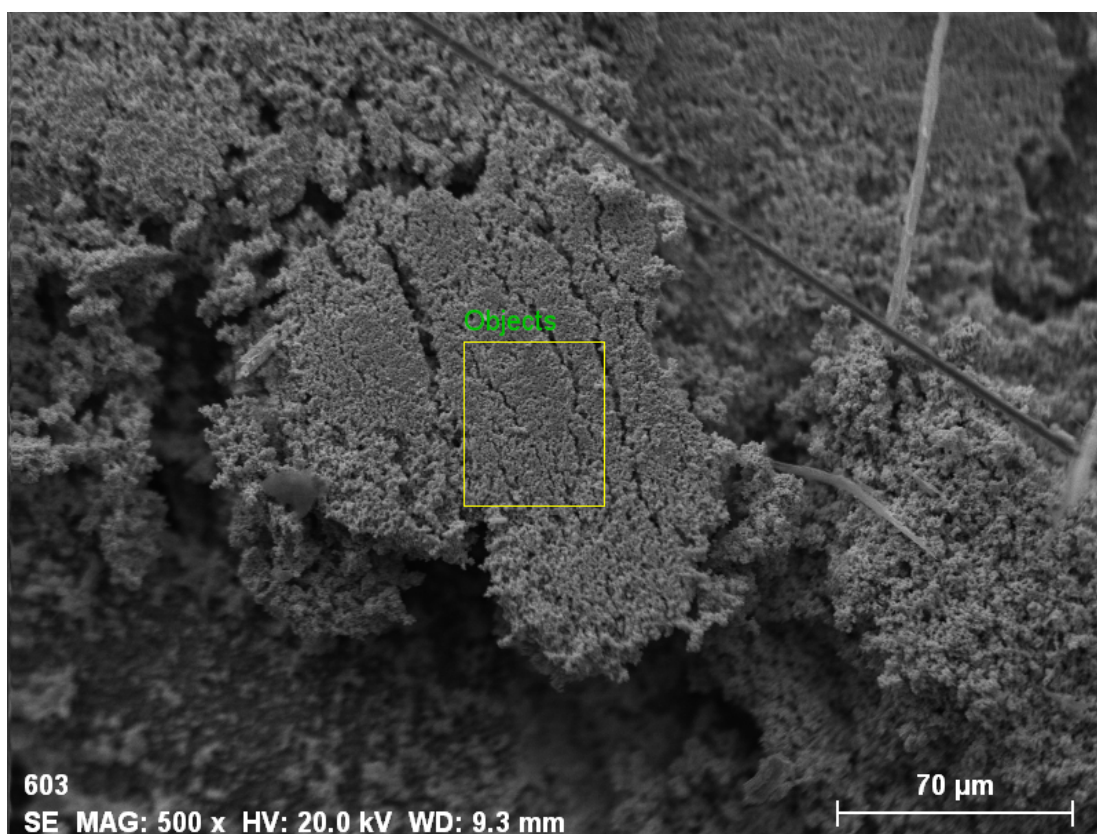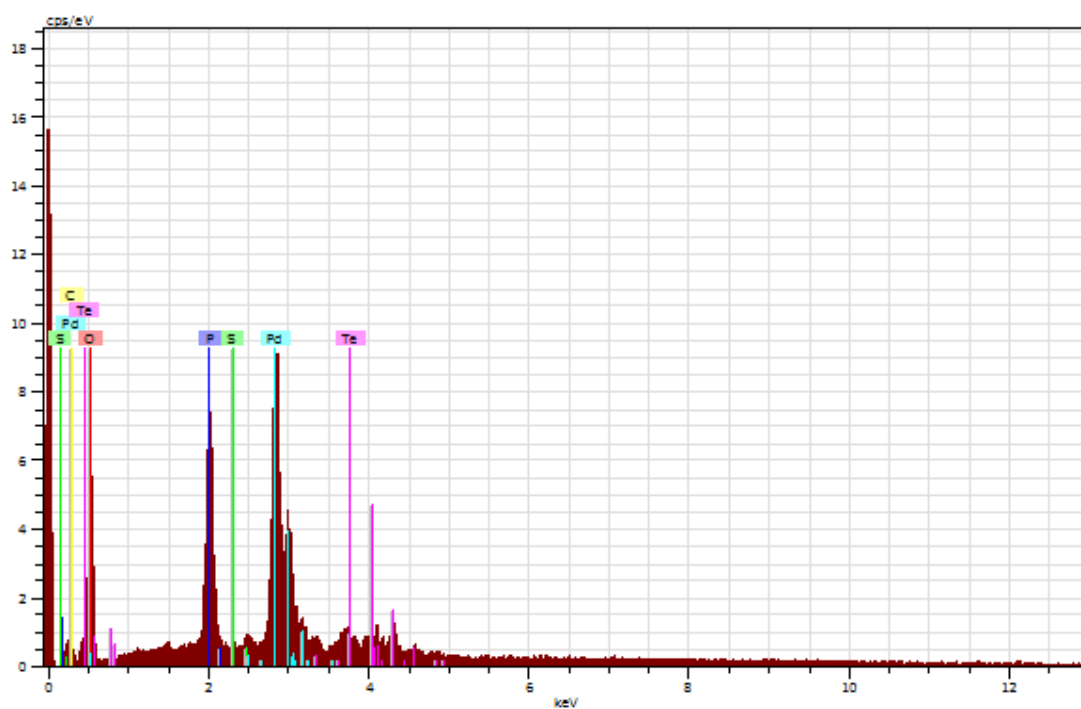

Fig. S41 SEM EDX of PdP<sub>2</sub> Nanoparticles obtained from 3
